# Supplementary material for: Discrimination of Euro 5 gasoline vs. Diesel light-duty engine primary and secondary particle emissions using multivariate statistical analysis of high-resolution mass spectrometry (HRMS) fingerprint
Source: Copernicus journal article supplement (doi:10.5194/ar-2025-25), 2025-08-13
Supplement: Supplementary file 1 [file ar-2025-25-supplement.pdf]

## Supplementary Material

### **Discrimination of Euro 5 gasoline vs. Diesel light-duty engine primary and secondary particle emissions using multivariate statistical analysis of high-resolution mass spectrometry (HRMS) fingerprint**

Camille Noblet<sup>1,2</sup>, Francois Lestremau<sup>1,3</sup>, Adrien Dermigny<sup>1</sup>, Nicolas Karoski<sup>1</sup>, Claudine Chatellier<sup>1</sup>, Jérôme Beaumont<sup>1</sup>, Yao Liu<sup>4</sup>, Boris Vansevenant<sup>4</sup>, Jean-Luc Besombes<sup>2</sup>, and Alexandre Albinet<sup>1</sup>

<sup>1</sup>Institut National de l'Environnement industriel et des RISques (Ineris), 60550 Verneuil en Halatte, France

<sup>2</sup>Université Savoie Mont-Blanc, EDYTEM, 73000 Chambéry, France

<sup>3</sup>HSM, Univ Montpellier, IMT Mines Ales, CNRS, IRD, Ales, France<sup>4</sup>Université Gustave Eiffel, Univ Lyon, AME-EASE, F-69675 Lyon, France

*Correspondence to:* Alexandre Albinet ([alexandre.albinet@ineris.fr](mailto:alexandre.albinet@ineris.fr)) and Francois Lestremau ([francois.lestremau@mines-ales.fr](mailto:francois.lestremau@mines-ales.fr))

# 1 Vehicle tested, driving cycles and fuels

**Table S1. Characteristics of the two tested vehicles.**

| Vehicle                   | Nº1                   | Nº2                             |
|---------------------------|-----------------------|---------------------------------|
| Type                      | 1.4 TSI, 16V DSG7, ID | 1.6 HDI <sup>c</sup>            |
| Fuel                      | Gasoline              | Diesel                          |
| Standard                  | Euro 5                | Euro 5                          |
| Empty weight (kg)         | 1285                  | 1080                            |
| Mileage (km)              | 92550                 | 105823                          |
| Gearbox (number of gears) | Sequential (7)        | Manual (5)                      |
| Post treatment system     | TWC <sup>a</sup>      | DOC + Additive DPF <sup>b</sup> |
| In-service date           | 10/21/2009            | 10/30/2013                      |

<sup>a</sup>TWC: Three-way catalysis

<sup>b</sup>DOC + Additive DPF: Diesel Oxidation Catalyst + Additive Diesel Particulate Filter

<sup>c</sup>HDI: High pressure direct injection

**Table S2. Main characteristics of the fuel used for the tested vehicles.**

|                                            | Diesel B7 | Gasoline SP95-E10 |
|--------------------------------------------|-----------|-------------------|
| Color                                      | yellow    |                   |
| Density at 15 °C (kg m <sup>-3</sup> )     | 833.4     | 739.4             |
| Sulphur content (mg kg <sup>-1</sup> )     | 9.7       | 8.7               |
| Water content (mg kg <sup>-1</sup> )       | 100       |                   |
| Total contamination (mg kg <sup>-1</sup> ) | < 12      |                   |
| Total aromatic hydrocarbons (% m)          | 27.8      |                   |
| Polycyclic aromatic hydrocarbons (% m)     | 4.7       |                   |
| Lead content (mg L <sup>-1</sup> )         | ---       | < 2.5             |
| Manganese content (mg L <sup>-1</sup> )    | ---       | < 5.0             |
| Benzene content (% m)                      | ---       | 0.61              |
| Ethanol content (% vol)                    | ---       | 7.3               |
| ETBE content (% vol)                       | ---       | 5.74              |
| Total oxygenated compounds (% vol)         | ---       | 13.29             |
| Oxygen content (% m)                       | ---       | 3.7               |
| Aromatic content (% vol)                   | ---       | 22.2              |
| Olefin content (% vol)                     | ---       | 15.3              |
| Saturated content (% vol)                  | ---       | 49.3              |

26 **2 Sampling setup**

27 **Table S3. Overview of all instruments used to measure the gas- and particulate-phase pollutants for the experiments.**

| Measured parameters                    | Phase    | Sampling location           | Instrument                                                                                           | Note   |
|----------------------------------------|----------|-----------------------------|------------------------------------------------------------------------------------------------------|--------|
| O <sub>2</sub>                         | Gas      | Emission and after dilution | Multigas analyzer PG250 (Horiba)<br>Range: 0–25% in volume                                           | Online |
| CO                                     | Gas      | Emission and after dilution | Multigas analyzer PG250 (Horiba)<br>Range: 0–1000 ppm                                                | Online |
| NO/NO <sub>x</sub>                     | Gas      | Emission                    | Multigas analyzer PG250 (Horiba)<br>Range: 0–100 ppm                                                 | Online |
|                                        |          | After dilution              | Model 42i (NO-NO <sub>2</sub> -NO <sub>x</sub> ) Analyzer (Thermo)<br>Range: 0–100 ppm               |        |
| CO <sub>2</sub>                        | Gas      | Emission                    | VA 3000 (Horiba)<br>Range: 0–10000 ppm                                                               | Online |
|                                        |          | After dilution              | VA 3000 (Horiba)<br>Range: 0–5000 ppm                                                                |        |
| SO <sub>2</sub>                        | Gas      | After dilution              | AF 21 M Environnement S.A.<br>Range: 0–0.05 ppm                                                      | Online |
| O <sub>3</sub>                         | Gas      | After dilution              | Model 202, 2B Technologies<br>Range: 0–250 ppm                                                       | Online |
| Particle number                        | Particle | After dilution              | CPC Grimm Serie 5.400<br>Range: 5–1000 nm<br>CPC TSI 3775<br>Range: 4–1000 nm                        | Online |
| Non-refractory PM chemical composition | Particle | After dilution              | Time of Flight-Aerosol Chemical Speciation Monitor (ToF-ACSM) Aerodyne Research<br>Range: 40–1000 nm | Online |

28  
29

### 3 Non-target screening analyses

Table S4. List of solvents and chemicals used (suppliers and purity).

| Compound                                                             | Supplier                       | Purity (%)      |
|----------------------------------------------------------------------|--------------------------------|-----------------|
| <i>Extraction and injection internal standards</i>                   |                                |                 |
| Beflubutamid-d <sub>7</sub>                                          | HPC Standards                  | 99.8            |
| Metsulfuron-d <sub>3</sub>                                           | HPC Standards                  | 99.6            |
| Succinic acid-d <sub>4</sub>                                         | CDN Isotopes                   | 99.0            |
| Nonanedioic acid-d <sub>14</sub>                                     | CDN Isotopes                   | 99.0            |
| <sup>13</sup> C-Sulfamethazine                                       | Sigma Aldrich                  | 99.9            |
| Simazine-d <sub>10</sub>                                             | Dr Ehrenstorfer                | 98.1            |
| Diuron-d <sub>6</sub>                                                | Dr Ehrenstorfer                | 99.6            |
| <sup>13</sup> C-Diclofenac                                           | Dr Ehrenstorfer                | 97.7            |
| 9,10-Anthraquinone-d <sub>8</sub>                                    | CDN Isotopes                   | 99.0            |
| 1-Nitronaphthalene-d <sub>7</sub>                                    | CDN Isotopes                   | 98.3            |
| Benzo[g,h,i]perylene-d <sub>12</sub>                                 | CDN Isotopes                   | 99.4            |
| Pentadecane-d <sub>32</sub>                                          | Sigma Aldrich                  | 98.0            |
| Pentacosane-d <sub>52</sub>                                          | CDN Isotopes                   | 98.6            |
| Naphthalène-d <sub>8</sub>                                           | Supelco                        | 99.9            |
| 2,2',5,5'-tetrachlorobiphenyl <sup>13</sup> C <sub>12</sub> (PCB52*) | Wellington                     | 98.0            |
| Perylene-d <sub>12</sub>                                             | Cambridge Isotope Laboratories | 99.0            |
| <i>Solvents</i>                                                      |                                |                 |
| Acetonitrile                                                         | Honeywell, Merck               | 99.9            |
| Methanol                                                             | Honeywell, Merck               | 99.9            |
| Acetic acid                                                          | Fischer Chemical               | LC/MS Grade     |
| Ammonium acetate                                                     | Fischer Chemical               | LC/MS Grade     |
| Water                                                                | Millipore                      | Milli-Q (18 MΩ) |

Table S5. Internal standard solutions with concentrations of compounds (µg mL<sup>-1</sup>), mass, and retention time.

| Internal standard                                                    | Concentration (µg mL <sup>-1</sup> ) | Ionisation mode | Molecular mass (Da) | Retention time (RT, min) |
|----------------------------------------------------------------------|--------------------------------------|-----------------|---------------------|--------------------------|
| <b>LC</b>                                                            |                                      |                 |                     |                          |
| Beflubutamid-d <sub>7</sub>                                          | 0.5                                  | +/-             | 362.1635            | 16.74                    |
| Metsulfuron-d <sub>3</sub>                                           | 0.5                                  | +/-             | 384.0931            | 10.66                    |
| Succinic acid-d <sub>4</sub>                                         | 5                                    | -               | 122.0517            | 0.94                     |
| Nonanedioic acid-d <sub>14</sub>                                     | 5                                    | -               | 202.1927            | 10.41                    |
| <sup>13</sup> C-Sulfamethazine                                       | 5                                    | +               | 293.2900            | 7.24                     |
| <b>GC</b>                                                            |                                      |                 |                     |                          |
| 9,10-Anthraquinone-d <sub>8</sub>                                    | 1                                    |                 | 216.1026            | 20.60                    |
| 1-Nitronaphthalene-d <sub>7</sub>                                    | 1                                    |                 | 180.0916            | 16.60                    |
| Benzo[g,h,i]perylene-d <sub>12</sub>                                 | 1                                    |                 | 288.1692            | 30.56                    |
| Pentadecane-d <sub>32</sub>                                          | 0.05                                 |                 | 244.4513            | 14.99                    |
| Pentacosane-d <sub>52</sub>                                          | 1                                    |                 | 404.7333            | 24.81                    |
| Naphthalene-d <sub>8</sub>                                           | 0.1                                  |                 | 136.1128            | 11.04                    |
| 2,2',5,5'-tetrachlorobiphenyl <sup>13</sup> C <sub>12</sub> (PCB52*) | 0.05                                 |                 | 301.9626            | 20.29                    |
| Perylene-d <sub>12</sub>                                             | 1                                    |                 | 264.1692            | 28.18                    |

**Table S6. Injection internal standard solutions with molecular mass and retention time.**

| Internal standard            | Ionisation mode | Molecular mass (Da) | Retention time (RT, min) |
|------------------------------|-----------------|---------------------|--------------------------|
| <b>LC</b>                    |                 |                     |                          |
| Simazine-d <sub>10</sub>     | +               | 211.1409            | 11.95                    |
| Diuron-d <sub>6</sub>        | +/-             | 238.0547            | 13.69                    |
| <sup>13</sup> C-Diclofenac   | +/-             | 301.0368            | 15.61                    |
| <b>GC</b>                    |                 |                     |                          |
| 9-Fluorenone-d <sub>9</sub>  |                 | 212.1410            | 18.16                    |
| Phenanthrene d <sub>10</sub> |                 | 188.1410            | 18.5                     |

**Table S7. Chromatographic elution gradient for LC-HRMS.**

| Time (min) | Mobile phase A (%) | Mobile phase B (%) |
|------------|--------------------|--------------------|
| 0          | 98                 | 2                  |
| 2          | 98                 | 2                  |
| 9          | 60                 | 40                 |
| 20         | 2                  | 98                 |
| 25         | 2                  | 98                 |

**Table S8. QToF parameters for both ionization modes used.**

|                               |                                | ESI (+)            | ESI (-)             |
|-------------------------------|--------------------------------|--------------------|---------------------|
| <b>Source parameters</b>      | Sheath gas temperature (°C)    | 300                | 300                 |
|                               | Sheath gas flow (L/min)        | 13                 | 13                  |
|                               | Nebulization pressure (psig)   | 30                 | 30                  |
|                               | Capillary tension (V)          | 3500               | 3500                |
|                               | Auxiliary gas temperature (°C) | 200                | 200                 |
|                               | Auxiliary gas flow (L/min)     | 15                 | 15                  |
| <b>Acquisition parameters</b> | Mass range (m/z)               | 70–3200            | 70–3200             |
|                               | Calibration references         | 121.0508; 922.0098 | 112.9855; 1033.9881 |
|                               | Scan number (spectra/min)      | 4                  | 4                   |
|                               | IFunnel (V)                    | Funnel Exit DC: 50 | Funnel Exit DC: 50  |
|                               |                                | Funnel RF HP: 200  | Funnel RF HP: 200   |
|                               |                                | Funnel RF LP: 100  | Funnel RF LP: 100   |

54 **Table S9. GC-QToF operating conditions.**

| Parameters       |                                                                  | EI               | NICI                      |
|------------------|------------------------------------------------------------------|------------------|---------------------------|
| GC               | Injection type                                                   | Pulsed splitless |                           |
|                  | Injection pulse pressure (psi)                                   | 50               |                           |
|                  | Injection temperature (°C)                                       | 300              |                           |
|                  | Carrier gas flow rate (He, mL min <sup>-1</sup> )                | 1.2              |                           |
|                  | Transfer line temperature (°C)                                   | 280              |                           |
|                  | Quench gas flow rate (He, mL min <sup>-1</sup> )                 | 4                |                           |
|                  | Gas collision flow rate (N <sub>2</sub> , mL min <sup>-1</sup> ) | 1                |                           |
| Oven programming | Initial temperature (°C); hold time (min)                        | 40; 1.8          |                           |
|                  | Temperature rate (°C min <sup>-1</sup> )                         | 10               |                           |
|                  | Final temperature (min); hold time (min)                         | 325; 10          |                           |
|                  | Total (min)                                                      | 40.3             |                           |
| QToF             | Ionisation energy (eV)                                           | 70               |                           |
|                  | Source temperature (°C)                                          | 280              | 70                        |
|                  | Solvent delay (min)                                              | 6.5              | 185                       |
|                  | Reactant gas                                                     | -                | -                         |
|                  |                                                                  |                  | CH <sub>4</sub> (99.999%) |
| Mass range (m/z) |                                                                  | 20–600           | -                         |

55

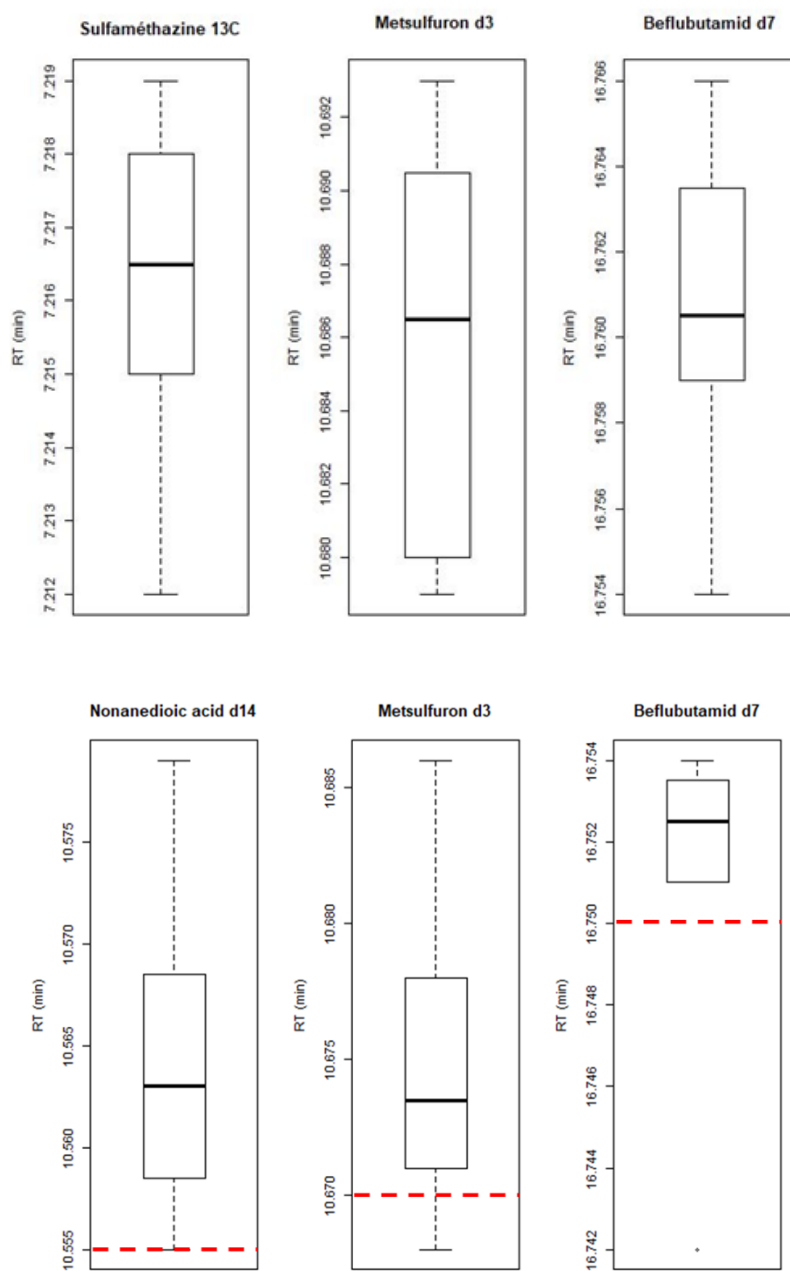

**Figure S1. Variation of the monoisotopic ion retention time in QC samples of different internal standards of extraction (EIS) in ESI (+) (top) and ESI (-) (bottom) modes during sample analysis by LC-QToF. The retention time values of these compounds (corresponding to the analysis of the analytical standard for this substance) are represented by the red lines. Note they are out of the range for  $^{13}\text{C}$ -sulfamethazine (7.425 min), metsulfuron- $\text{d}_3$  (16.670 min) and beflutamid- $\text{d}_7$  (16.750 min) in ESI (+).**

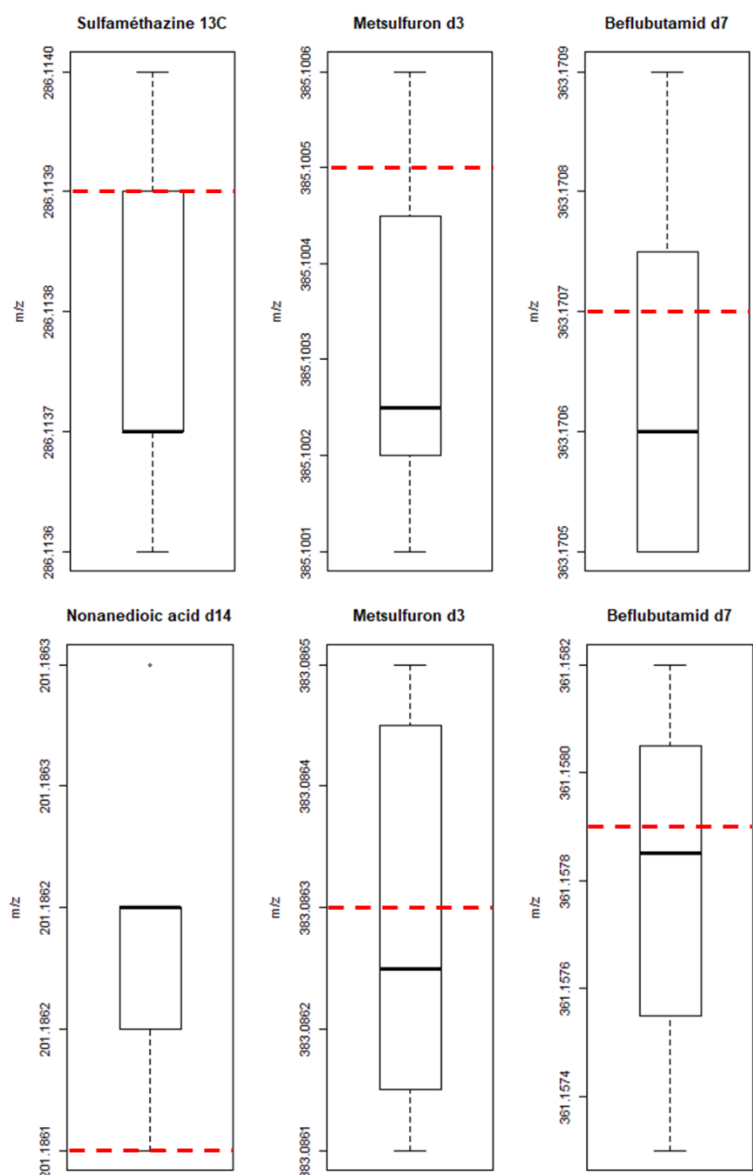

**Figure S2. Variation of the monoisotopic ion mass-to-charge ratio ( $m/z$ ) in QC samples of different extraction internal standards (EIS) in ESI (+) (top) and ESI (-) (bottom) mode during sample analysis by LC-QToF. The values of the ionized molecular weights are represented by the red lines.**



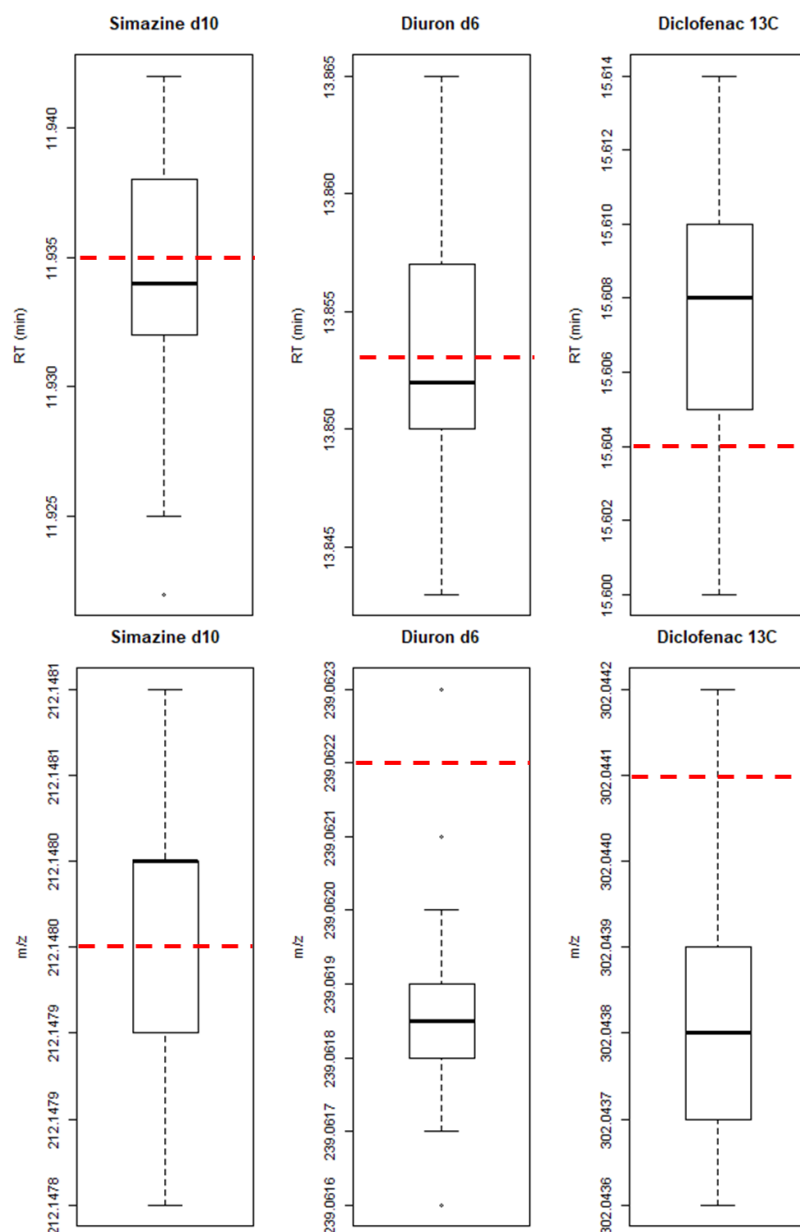

Figure S3. Variation of the retention time (left) and the monoisotopic ion mass-to-charge ratio ( $m/z$ ) (right) in QC samples of different injection internal standards (IIS) in ESI (+) mode during sample analysis by LC-QToF. The values of the ionized molecular weights are represented by the red lines.

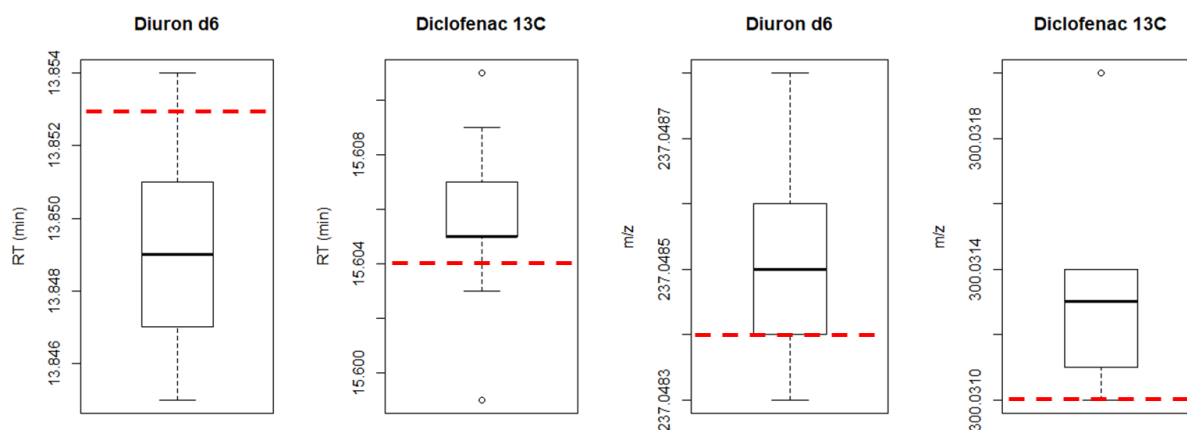

**Figure S4.** Variation of the retention time (left) and the monoisotopic ion mass-to-charge ratio (m/z) (right) in QC samples of different injection internal standards (IIS) in ESI (-) mode during sample analysis by LC-QToF. The values of the ionized molecular weights are represented by the red lines.

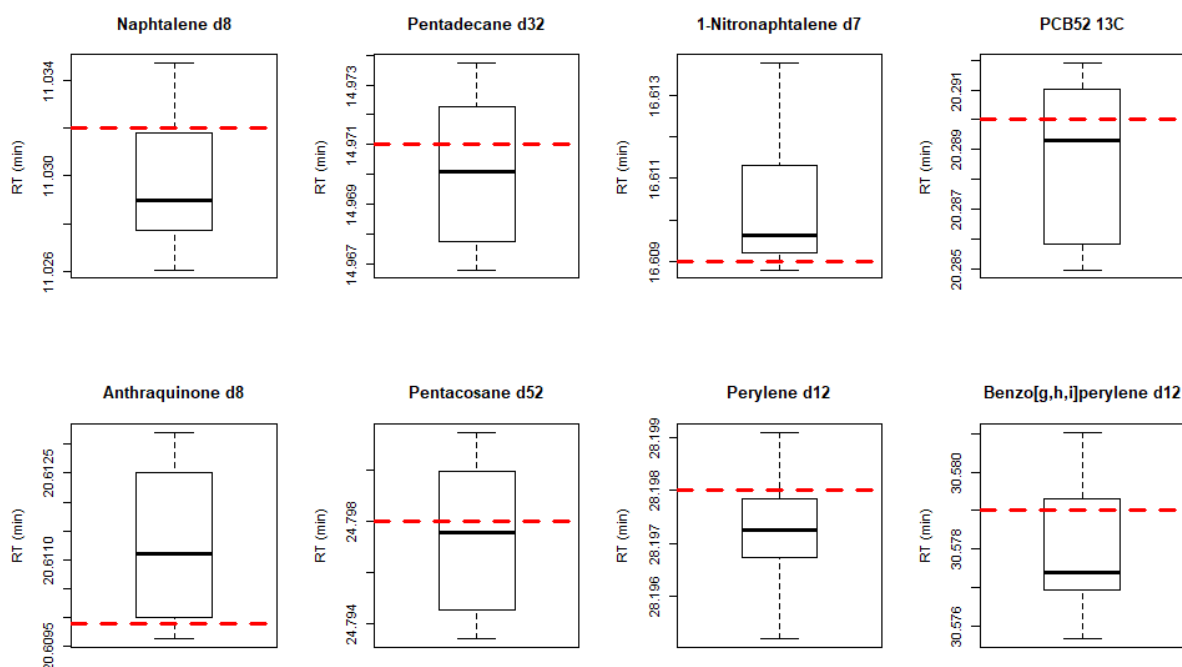

**Figure S5.** Variation of the retention time in QC samples of different injection internal standards (EIS) during sample analysis by GC-QToF. The values of the ionized molecular weights are represented by the red lines.

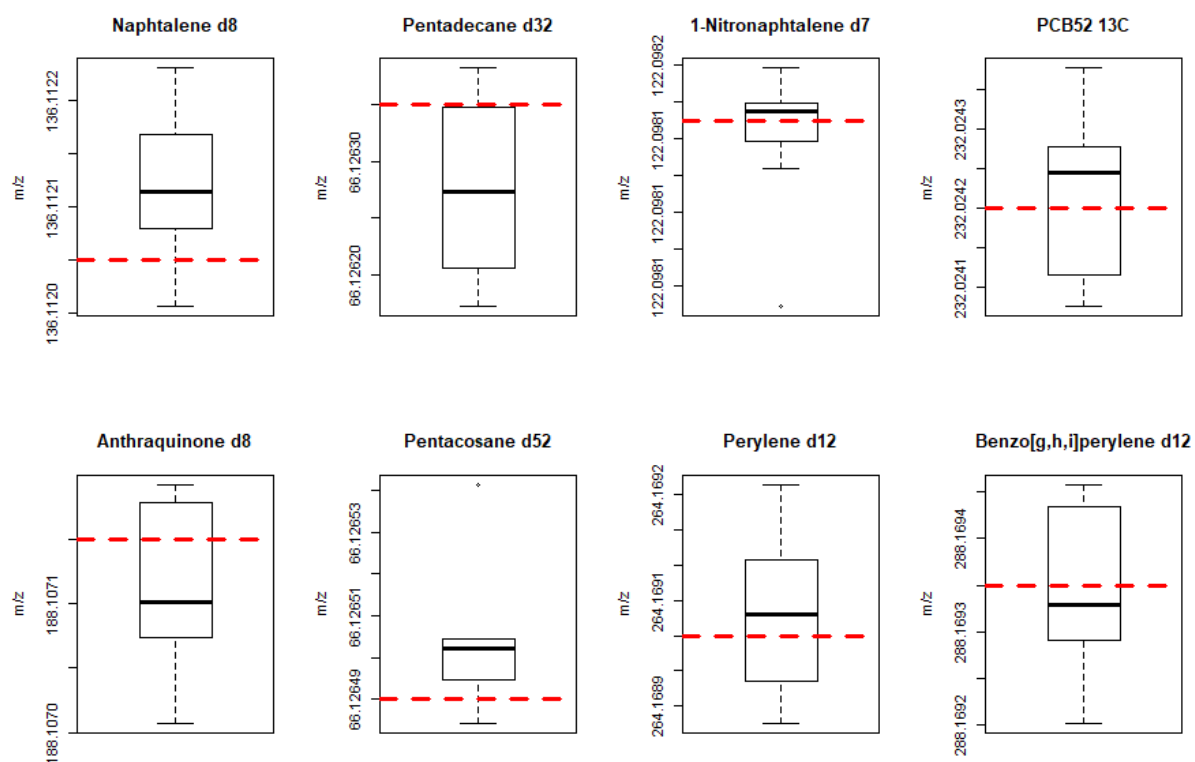

Figure S6. Variation of the monoisotopic ion mass-to-charge ratio ( $m/z$ ) in QC samples of different injection internal standards (EIS) during sample analysis by GC-QToF. The values of the ionized molecular weights are represented by the red line.

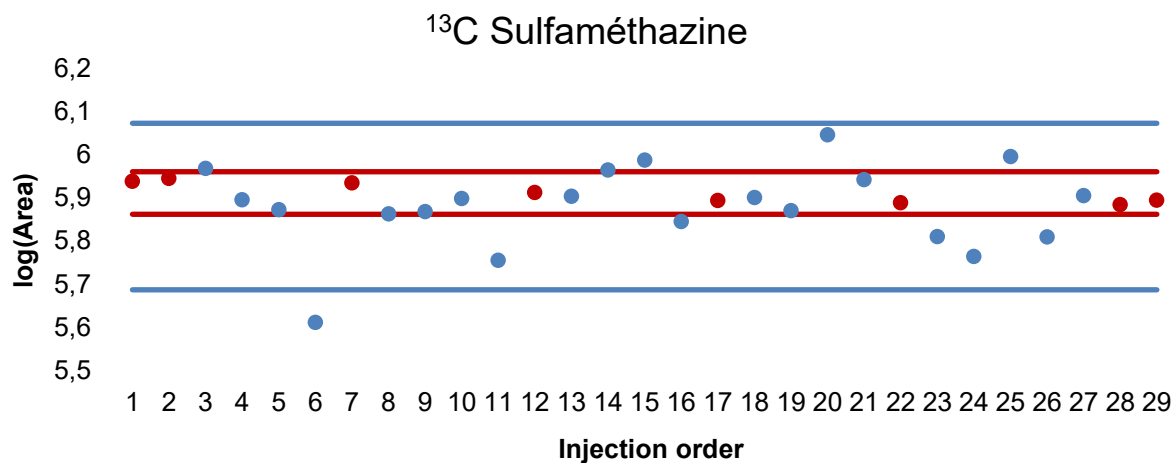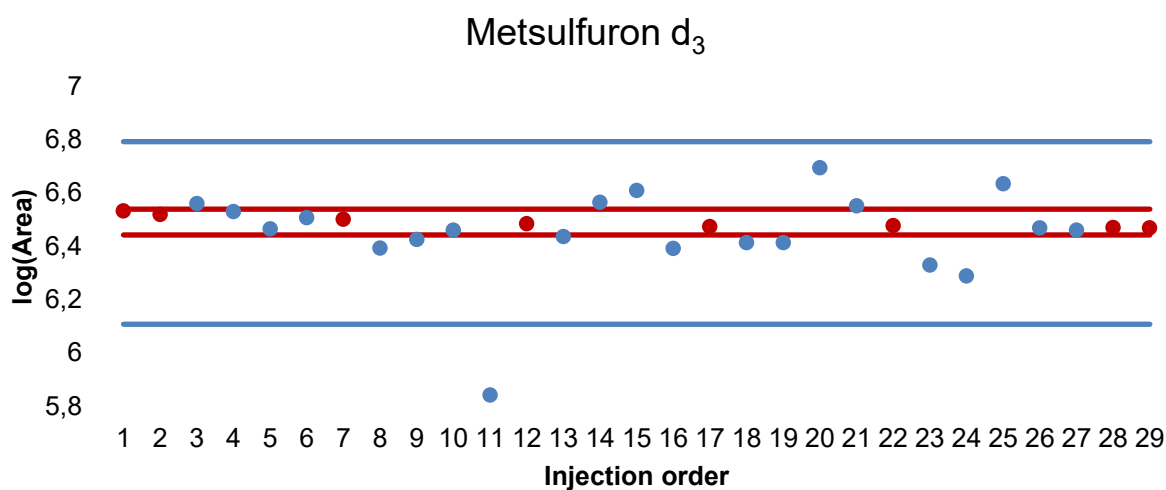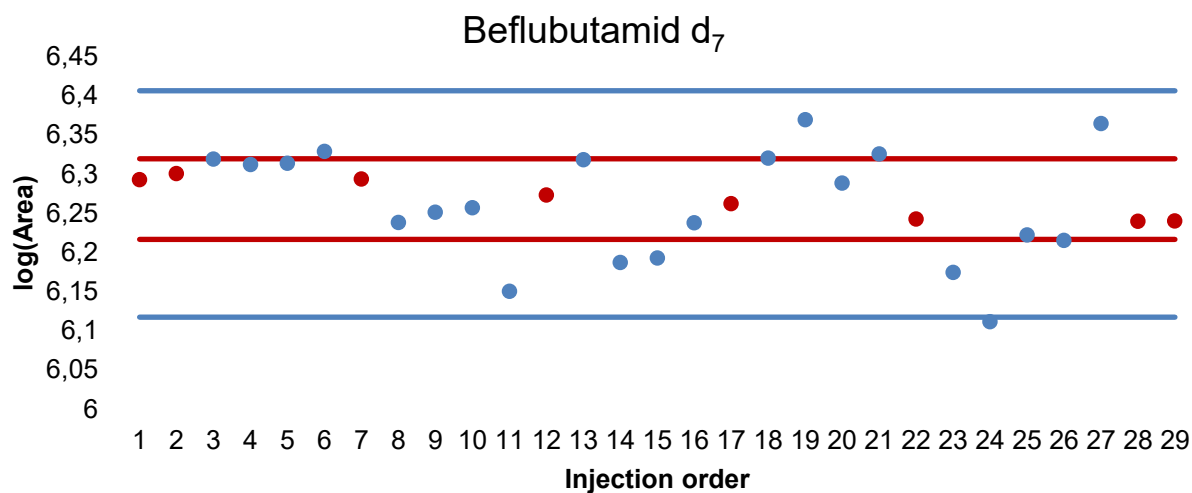

— -2SD (QC) — +2SD (QC) — -2SD (samples) — +2SD (samples) • Samples/QC

Figure S7. Control chart of areas (log area) observed for three internal extraction standards for QC pool samples (red dots) and vehicular combustion samples (blue dots) according to the injection order during LC-QToF analysis (ESI+). The red and blue lines represent the observed standard deviation ( $2\sigma$ ) for all pooled QC and combustion samples respectively.

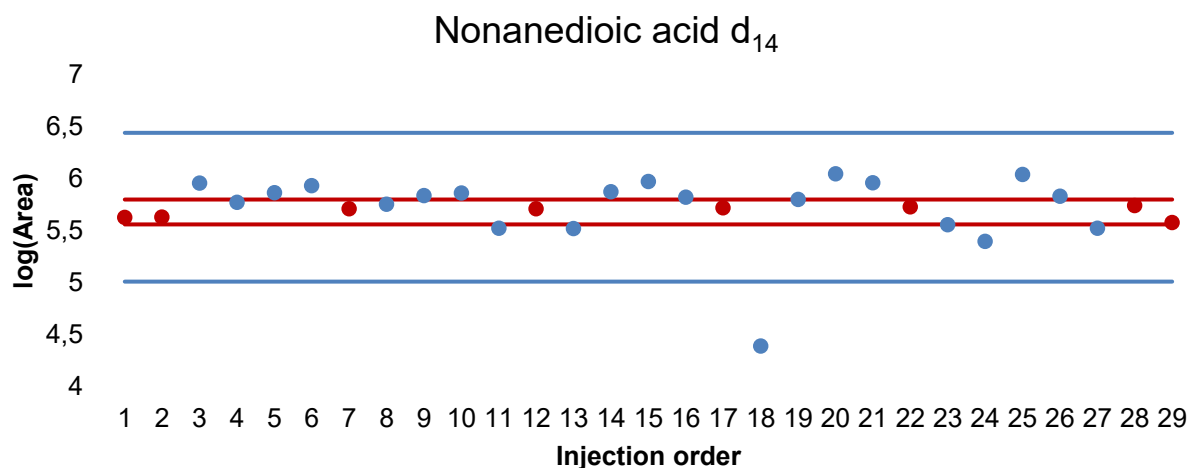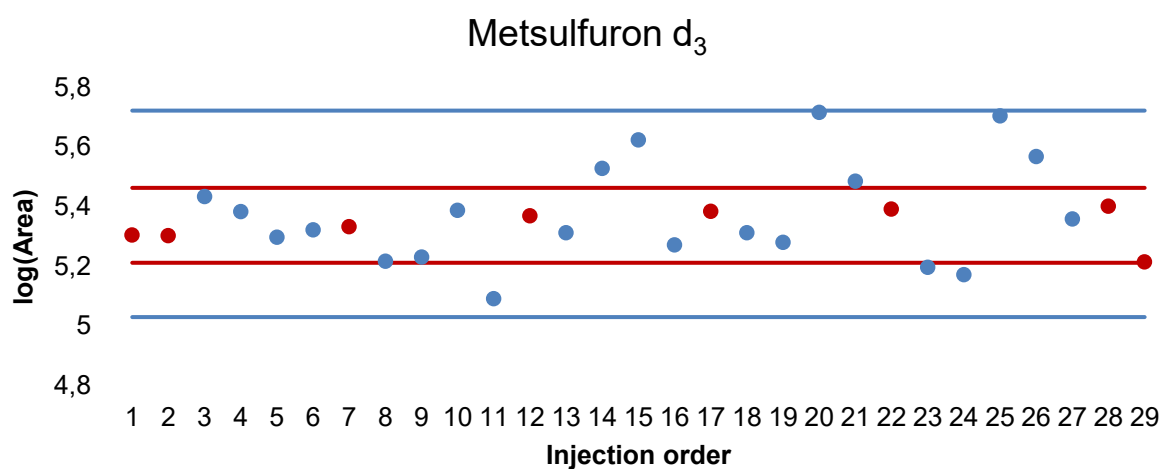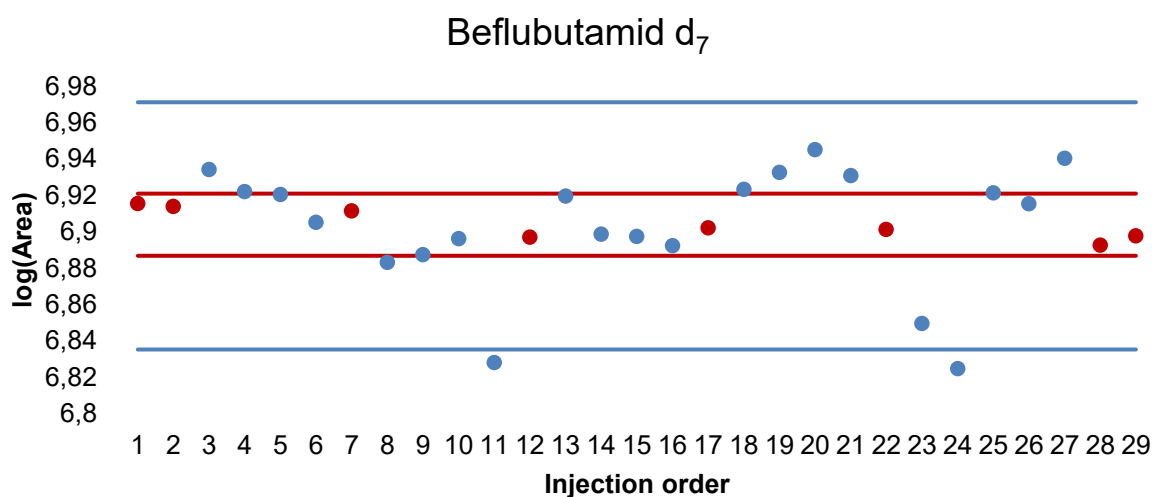

— -2SD (QC) — +2SD (QC) — -2SD (samples) — +2SD (samples) ● Samples/QC

Figure S8. Control chart of areas (log area) observed for three internal extraction standards for QC pool samples (red dots) and vehicular combustion samples (blue dots) according to the injection order during LC-QToF analysis (ESI-). The red and blue lines represent the observed standard deviation ( $2\sigma$ ) for all pooled QC and combustion samples respectively.

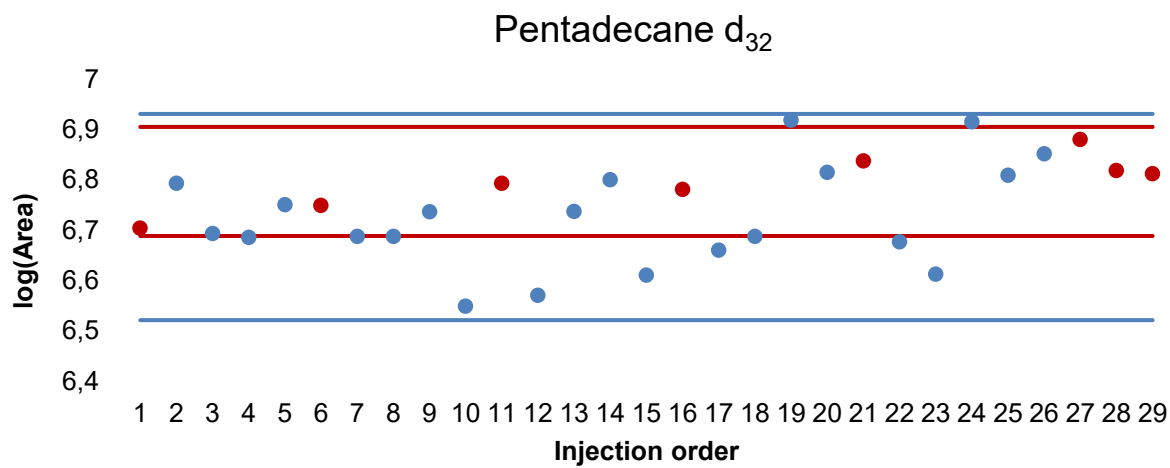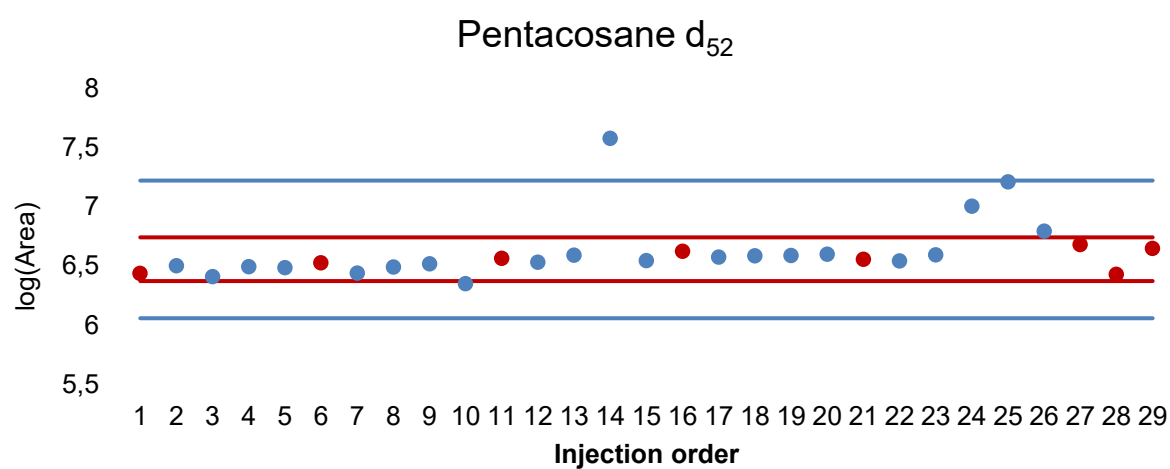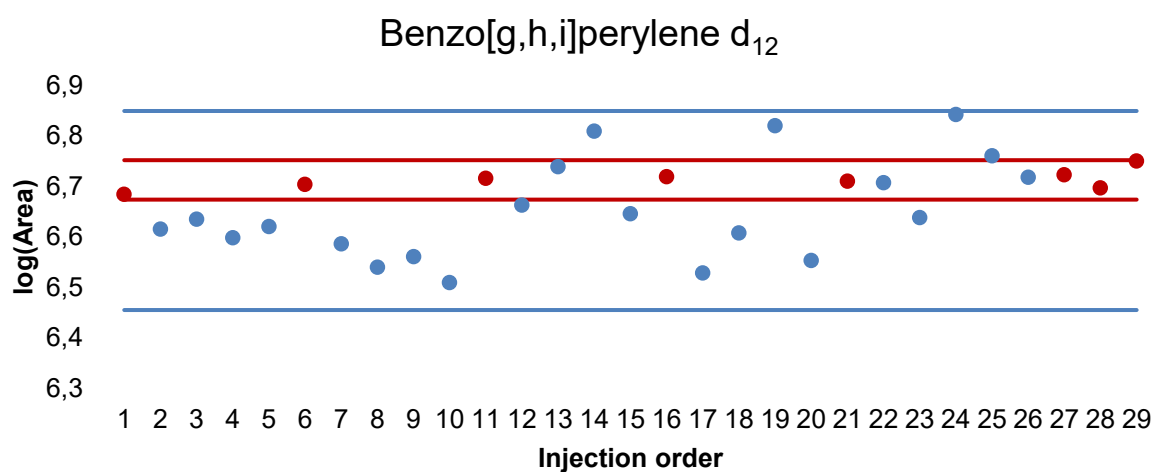

— - 2SD (QC) — + 2SD (QC) — - 2SD (samples) — + 2SD (samples) • Samples

**Figure S9.** Control chart of areas (log area) observed for three internal extraction standards for QC pool samples (red dots) and vehicular combustion samples (blue dots) according to the injection order during GC-QToF analysis. The red and blue lines represent the observed standard deviation ( $2\sigma$ ) for all pooled QC and combustion samples respectively.

## 5 Data treatment

**Table S10. Parameters used for features extraction with the RFE algorithm (Profinder, Agilent Technologies) with the number of detected entities and the number of entities retained in the final dataset.**

|                                         | LC-QToF        |                | GC-QToF    |
|-----------------------------------------|----------------|----------------|------------|
|                                         | ESI (+)        | ESI (-)        | HEI        |
| <b>First step:</b>                      |                |                |            |
| - Minimal height for peaks              | 25000          | 20000          | 40000      |
| - Binning and alignment:                |                |                |            |
| • Retention time window                 | 0.15 min       | 0.15 min       | 0.05 min   |
| • Mass window (LC)                      | 15 ppm + 2 mDa | 15 ppm + 2 mDa | /          |
| • Dot product (GC)                      | /              | /              | 0.6        |
| - Allowed ion species adduct            | H <sup>+</sup> | H <sup>-</sup> |            |
| <b>Second step:</b>                     |                |                |            |
| - Match tolerance                       |                |                |            |
| • RT                                    | ± 0.15 min     | ± 0.15 min     | ± 0.05 min |
| • Mass                                  | ± 10 ppm       | ± 10 ppm       |            |
| - Minimal height for peaks              | 20000          | 12000          | 37000      |
| Number of detected entities             | 2873           | 2879           | 2546       |
| Number of entities in the final dataset | 1833           | 1779           | 1088       |

6 Overview of the particulate and gaseous emissions of EURO 5 Diesel and gasoline vehicles

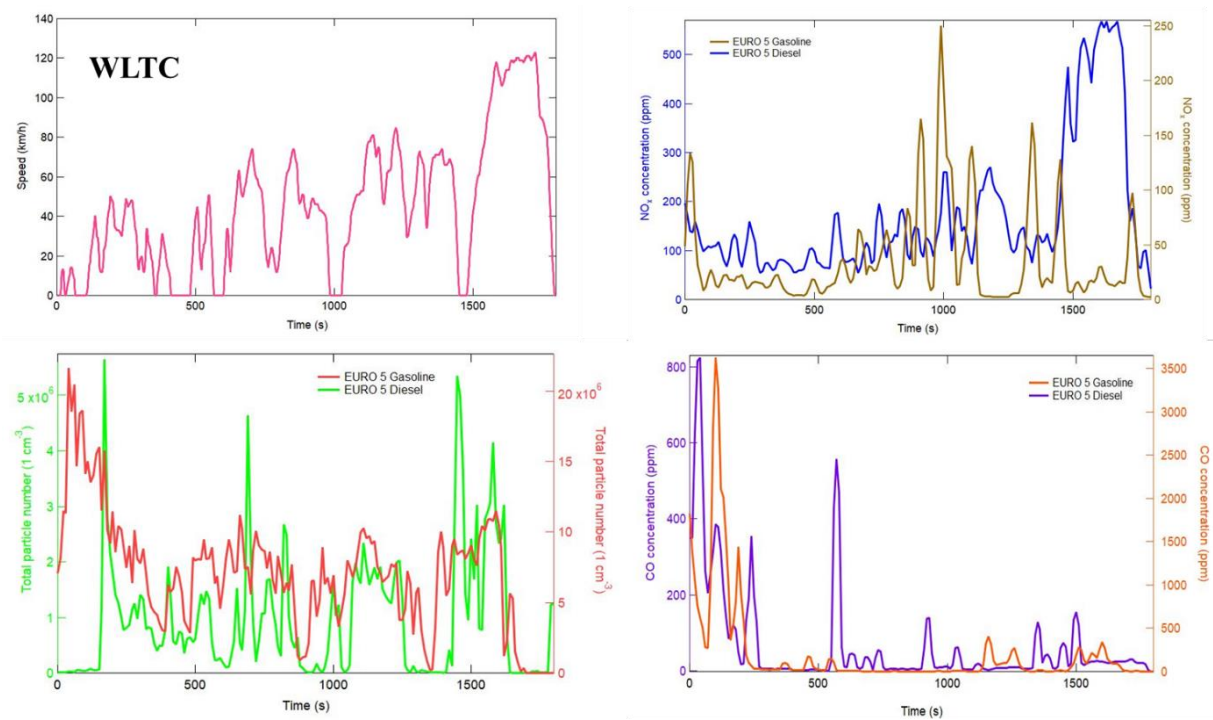

Figure S10. WLTC speed profile (pink) and time series of the primary particle number measured by the CPC (bottom left-corner), NO<sub>x</sub> (top right-corner) and CO concentrations (bottom right-corner) at emission for the studied EURO 5 Diesel and gasoline vehicles during the ambient start WLTC driving cycle.

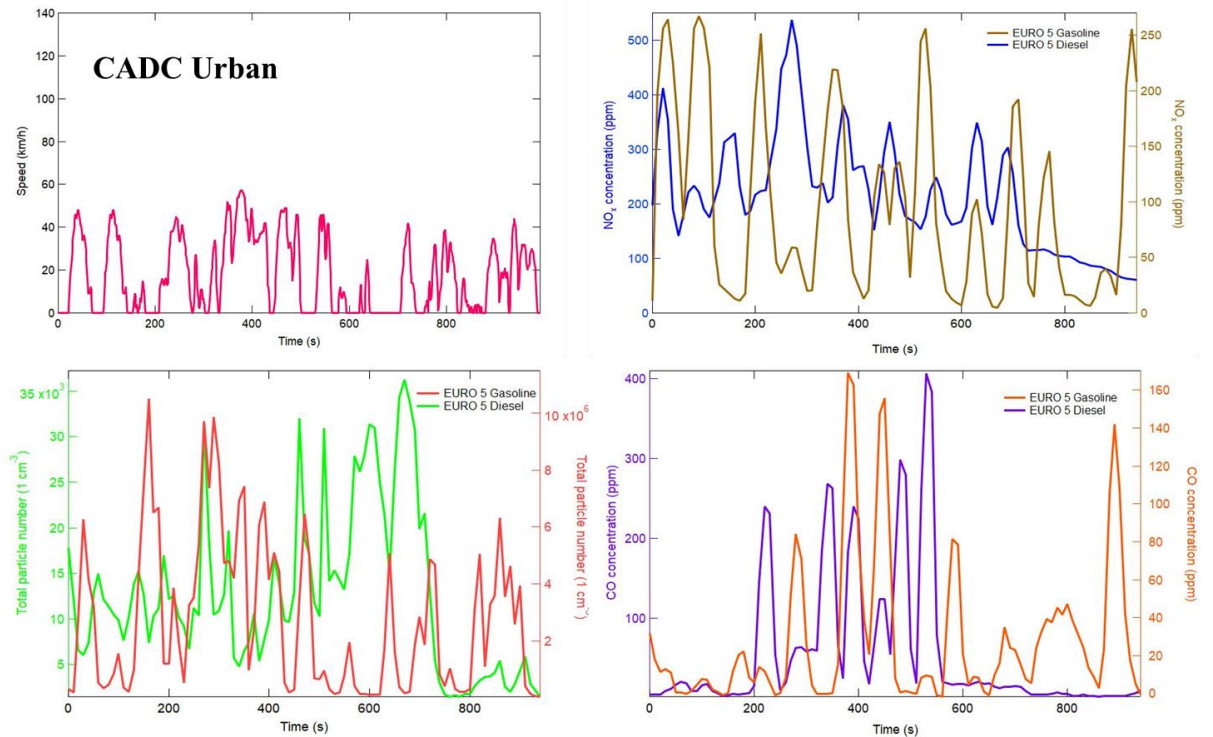

Figure S11. CADC urban speed profile (pink) and time series of the primary particle number measured by the CPC (bottom left-corner), NO<sub>x</sub> (top right-corner) and CO concentrations (bottom right-corner) at emission for the studied EURO 5 Diesel and gasoline vehicles during the hot-start CADC urban driving cycle.



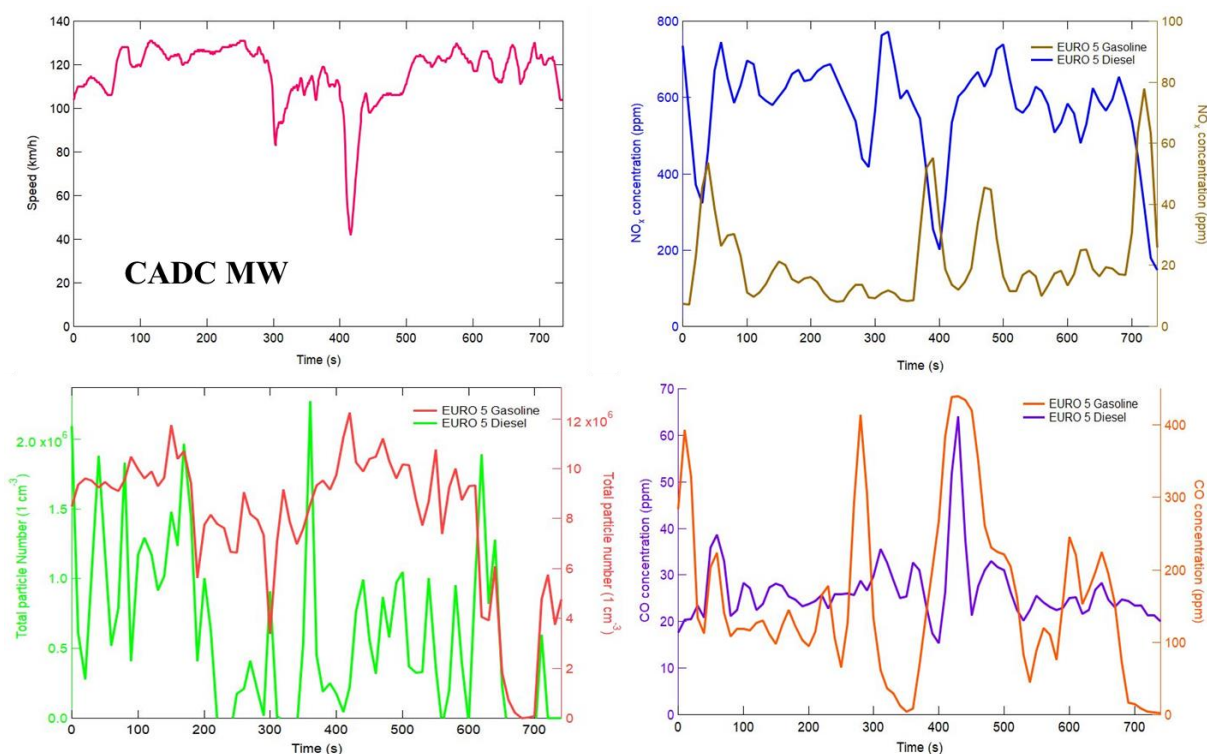

Figure S12. CADC motorway (MW) speed profile (pink) and time series of the primary particle number measured by the CPC (bottom left-corner), NO<sub>x</sub> (top right-corner) and CO concentrations (bottom right-corner) at emission for the studied EURO 5 Diesel and gasoline vehicles during the hot-start CADC motorway driving cycle.

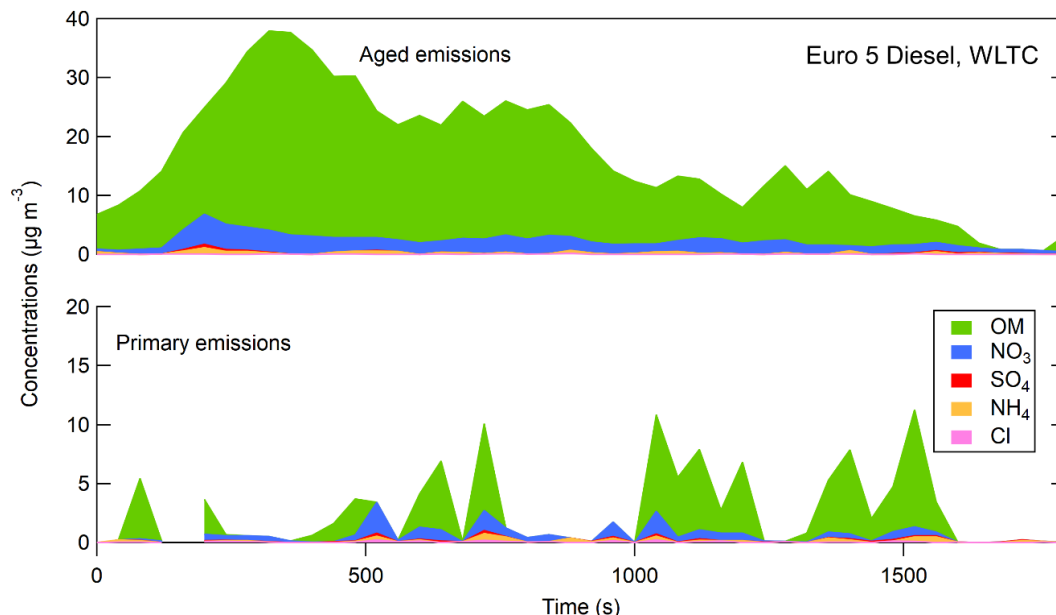

Figure S13. Temporal behaviour of organics, NO<sub>3</sub>, SO<sub>4</sub>, NH<sub>4</sub> and Cl concentrations (μg m<sup>-3</sup>) measured by the ACSM for the primary and aged emissions during the ambient start WLTC driving cycle for the EURO 5 Diesel vehicle. Concentrations without dilution corrections.

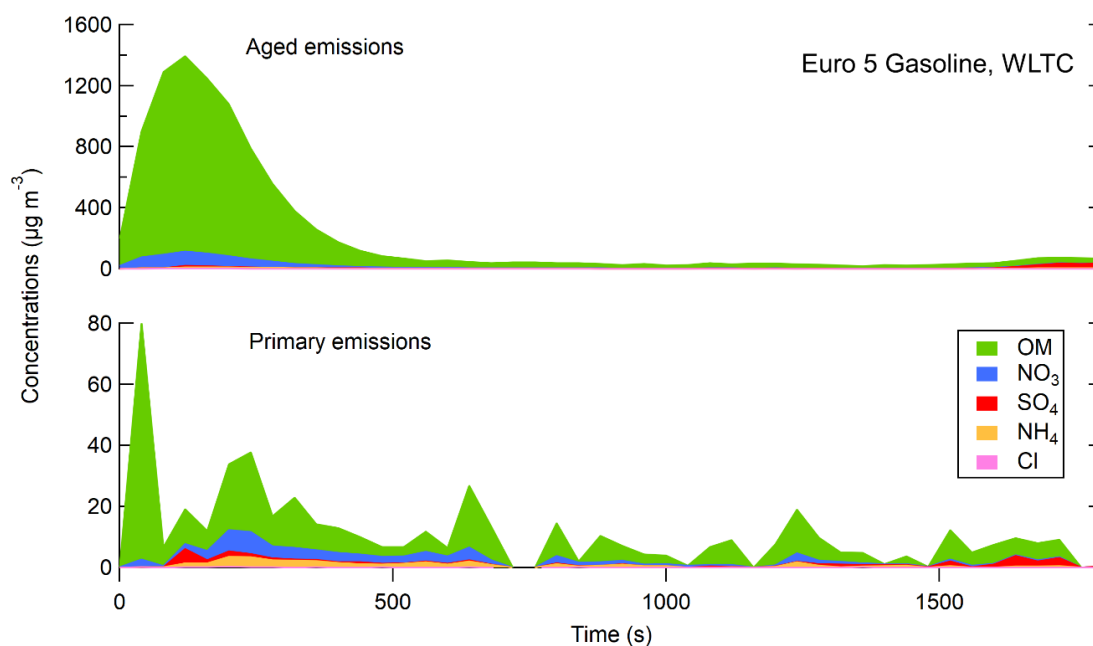

Figure S14. Temporal behaviour of organics,  $\text{NO}_3$ ,  $\text{SO}_4$ ,  $\text{NH}_4$  and  $\text{Cl}$  concentrations ( $\mu\text{g m}^{-3}$ ) measured by the ACSM for the primary and aged emissions during the ambient start WLTC driving cycle for the EURO 5 gasoline vehicle. Concentrations without dilution corrections.

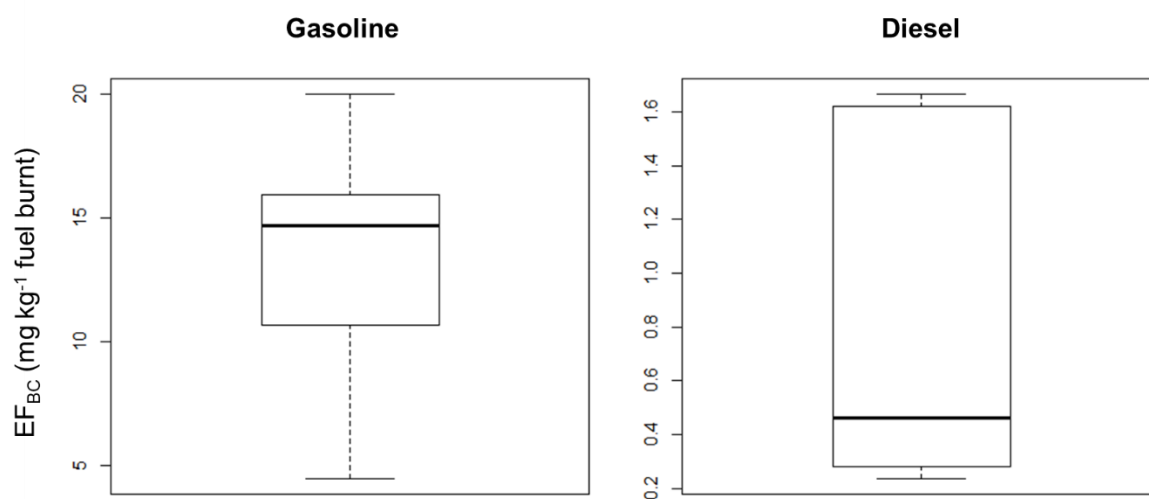

Figure S15. Boxplot of the primary BC concentrations ( $\mu\text{g m}^{-3}$ ) obtained for the EURO 5 gasoline and Diesel vehicles (all driving cycles).

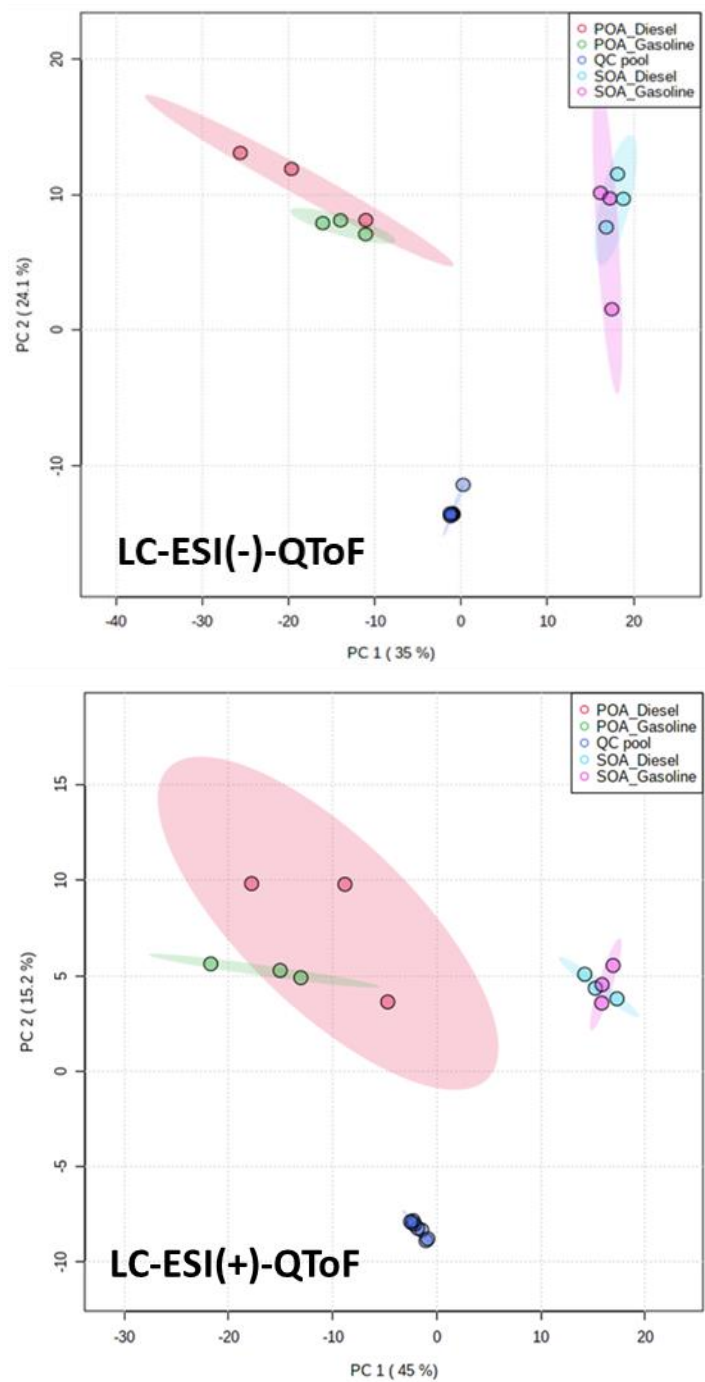

152 **Figure S16. Principal component analysis of samples from primary and secondary vehicular emissions (POA Diesel:**  
153 **red, POA gasoline: green, SOA Diesel: light blue, SOA gasoline: pink) and pooled QC samples (dark blue). The result**  
154 **is obtained from the NTS analysis performed by LC-QToF (ESI(+)) and ESI(-) mode). The data were normalized by**  
155 **pooled QC samples, log-transformed and auto-scaled. The ellipses represent the 95 % confidence zones.**

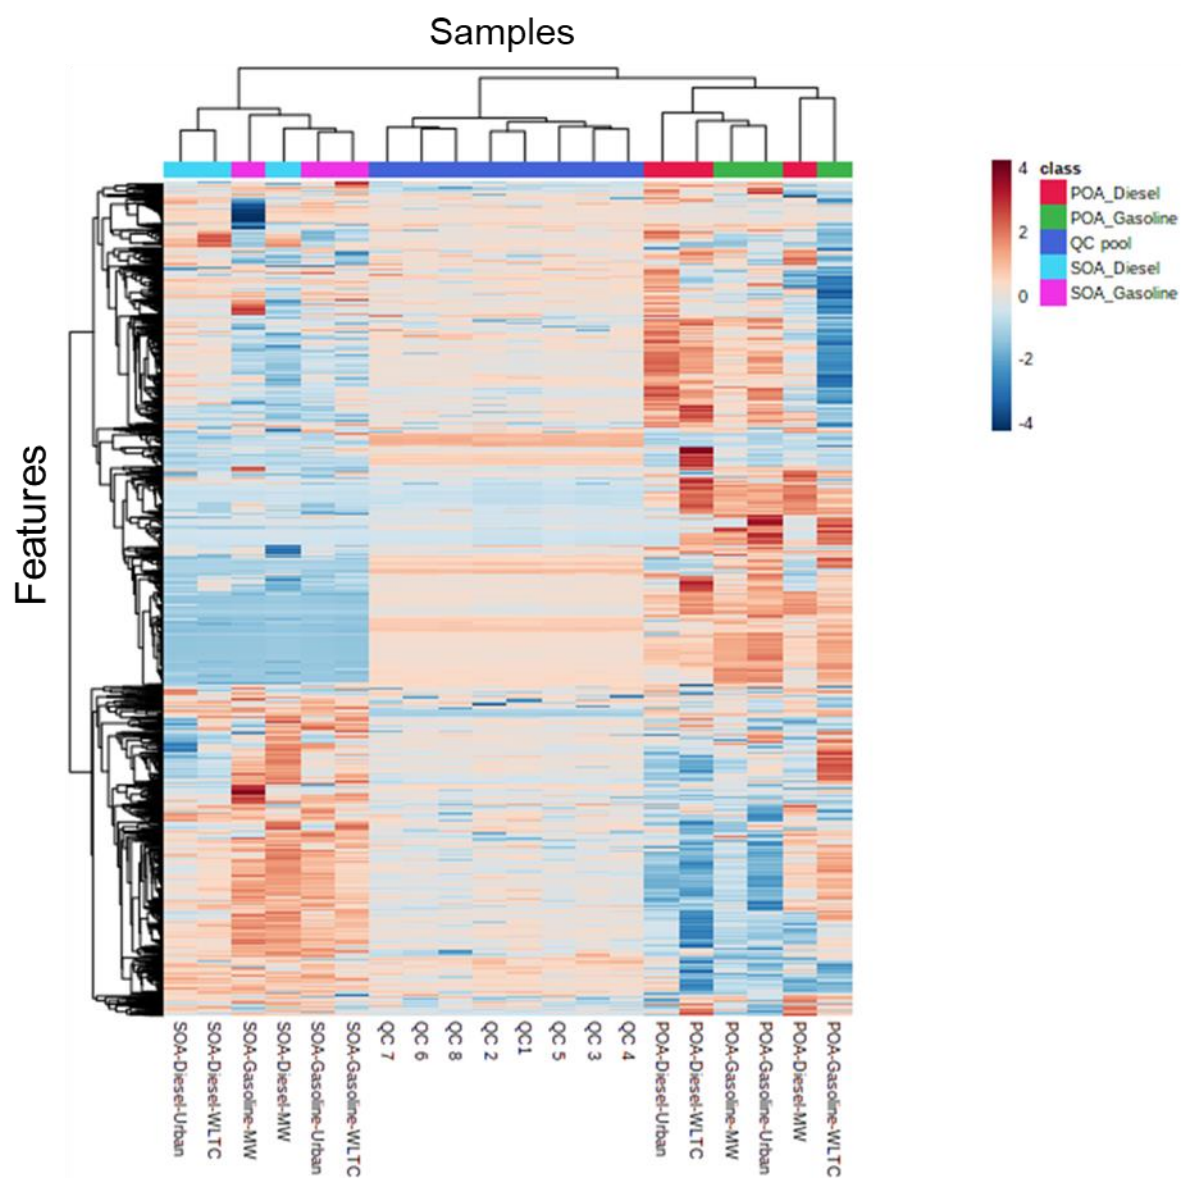

Figure S17. Two-way hierarchical classification and heat map of the different vehicular exhaust samples from LC-QToF analysis in ESI(+) mode. This classification was performed based on the Pearson correlation coefficient using the average linkage method. The colour-scale on the right represented the feature relative abundance in each sample compared to the others.

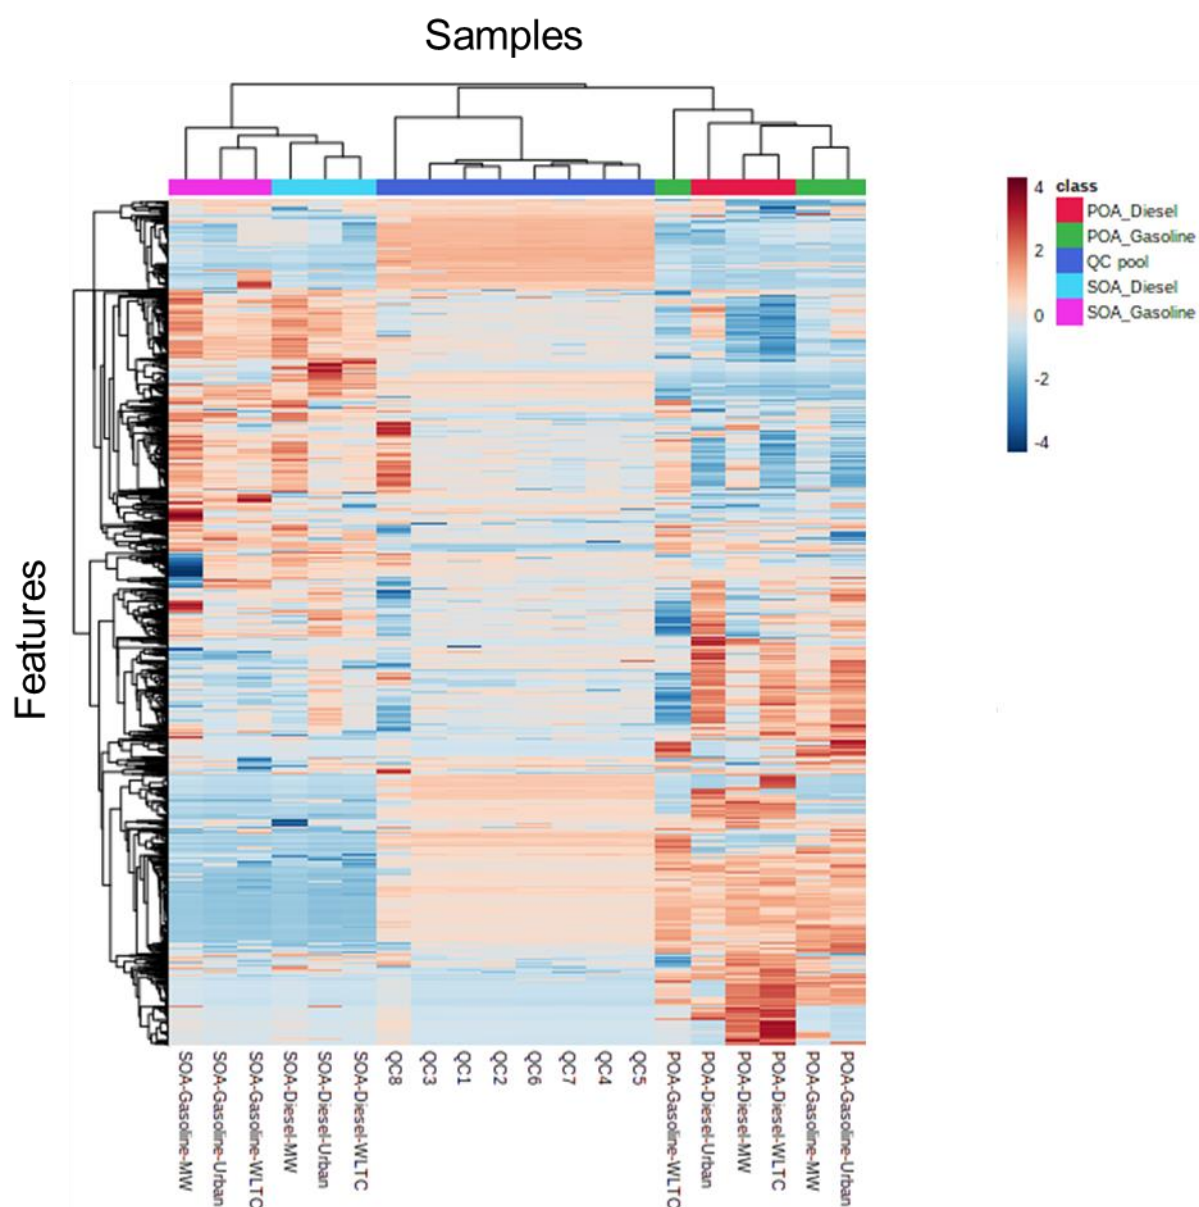

Figure S18. Two-way hierarchical classification and heat map of the different vehicular exhaust samples from LC-QToF analysis in ESI(-) mode. This classification was performed based on the Pearson correlation coefficient using the average linkage method. The colour-scale on the right represented the feature relative abundance in each sample compared to the others.

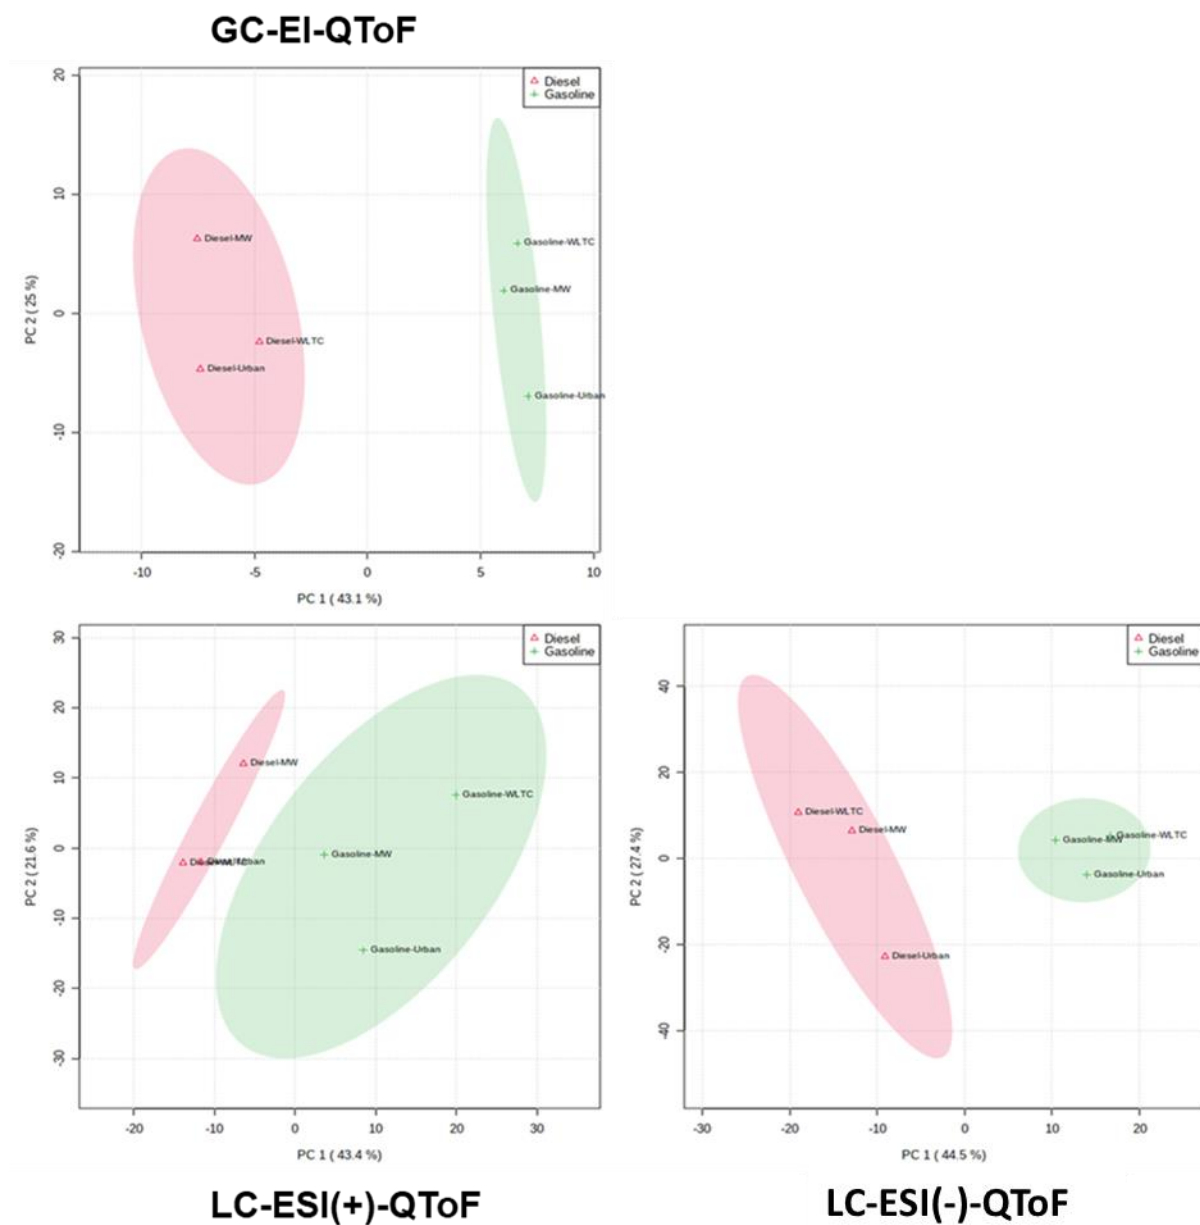

**Figure S19.** Principal component analyses (PCA) of POA samples from gasoline (green) and Diesel (red) vehicles. The results are obtained from the GC-QToF and LC-QToF data and were normalized by pooled QC samples, log-transformed and auto-scaled. The ellipses represent the 95 % confidence zones.

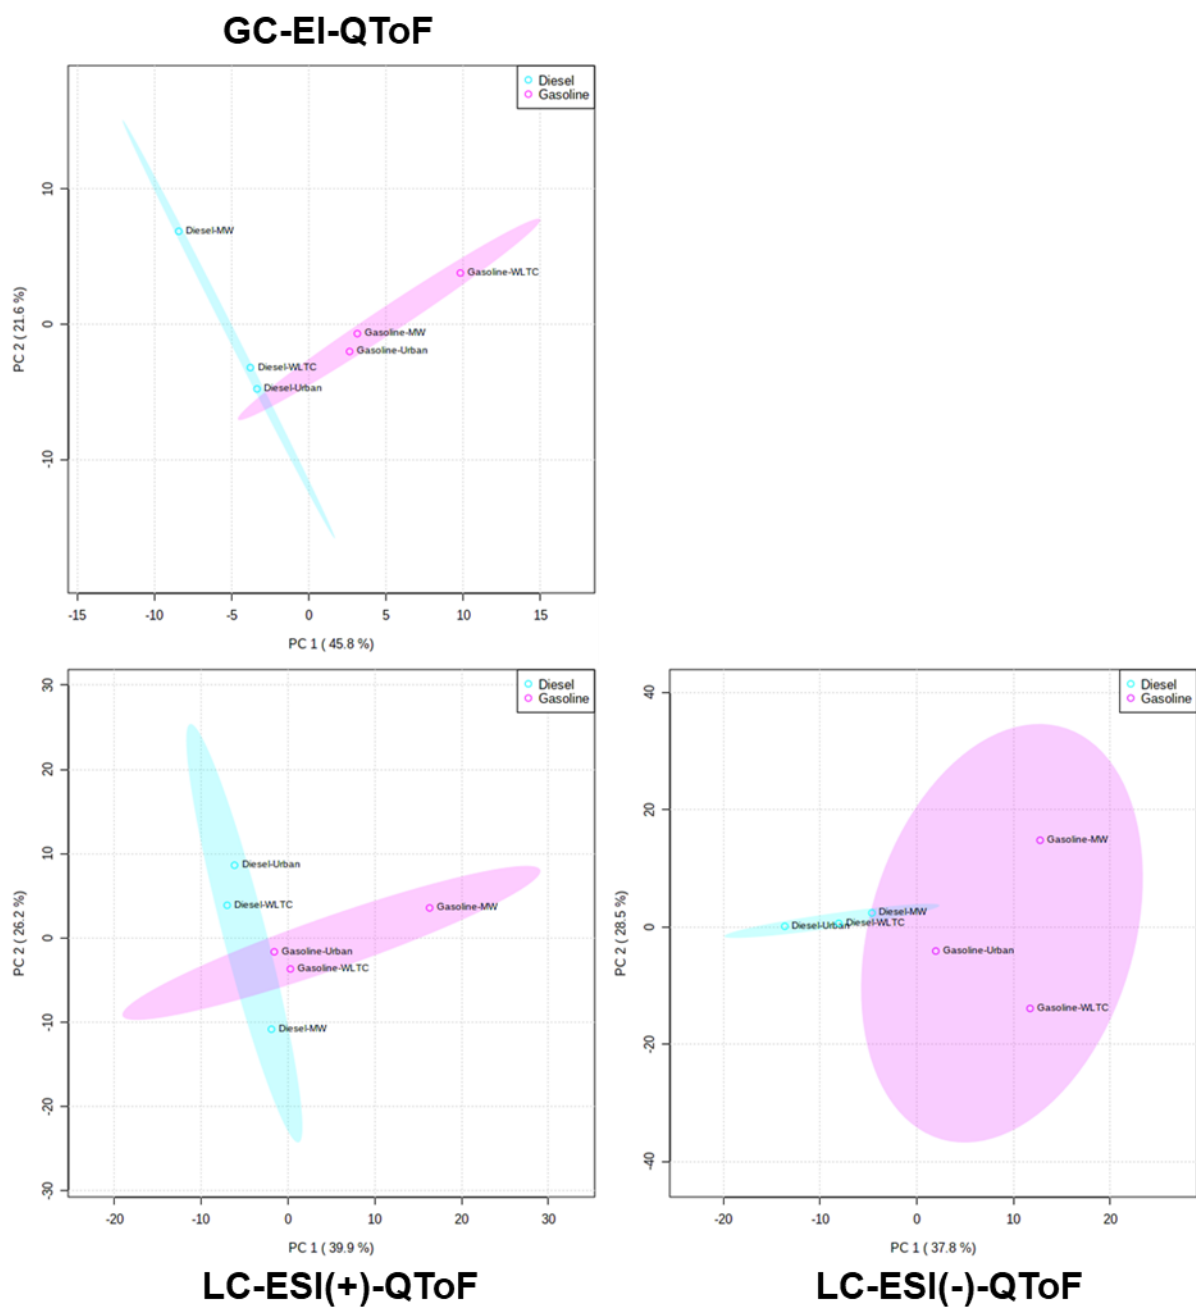

**Figure S20. Principal component analyses (PCA) of SOA samples from gasoline (pink) and Diesel (light blue) vehicles. The results are obtained from the GC-QToF and LC-QToF data and were normalized by pooled QC samples, log-transformed and auto-scaled. The ellipses represent the 95 % confidence zones.**



Table S11. Predictive ability of the different PLS-DA models

| OA fraction | Analysis       | R <sup>2</sup> X | Q <sup>2</sup> X |
|-------------|----------------|------------------|------------------|
| POA         | GC-QToF        | 0.99             | 0.83             |
|             | LC-ESI(+)-QToF | 0.97             | 0.65             |
|             | LC-ESI(-)-QToF | 0.98             | 0.70             |
| SOA         | GC-QToF        | 0.99             | 0.83             |
|             | LC-ESI(+)-QToF | 1.00             | 0.30             |
|             | LC-ESI(-)-QToF | 0.98             | 0.50             |

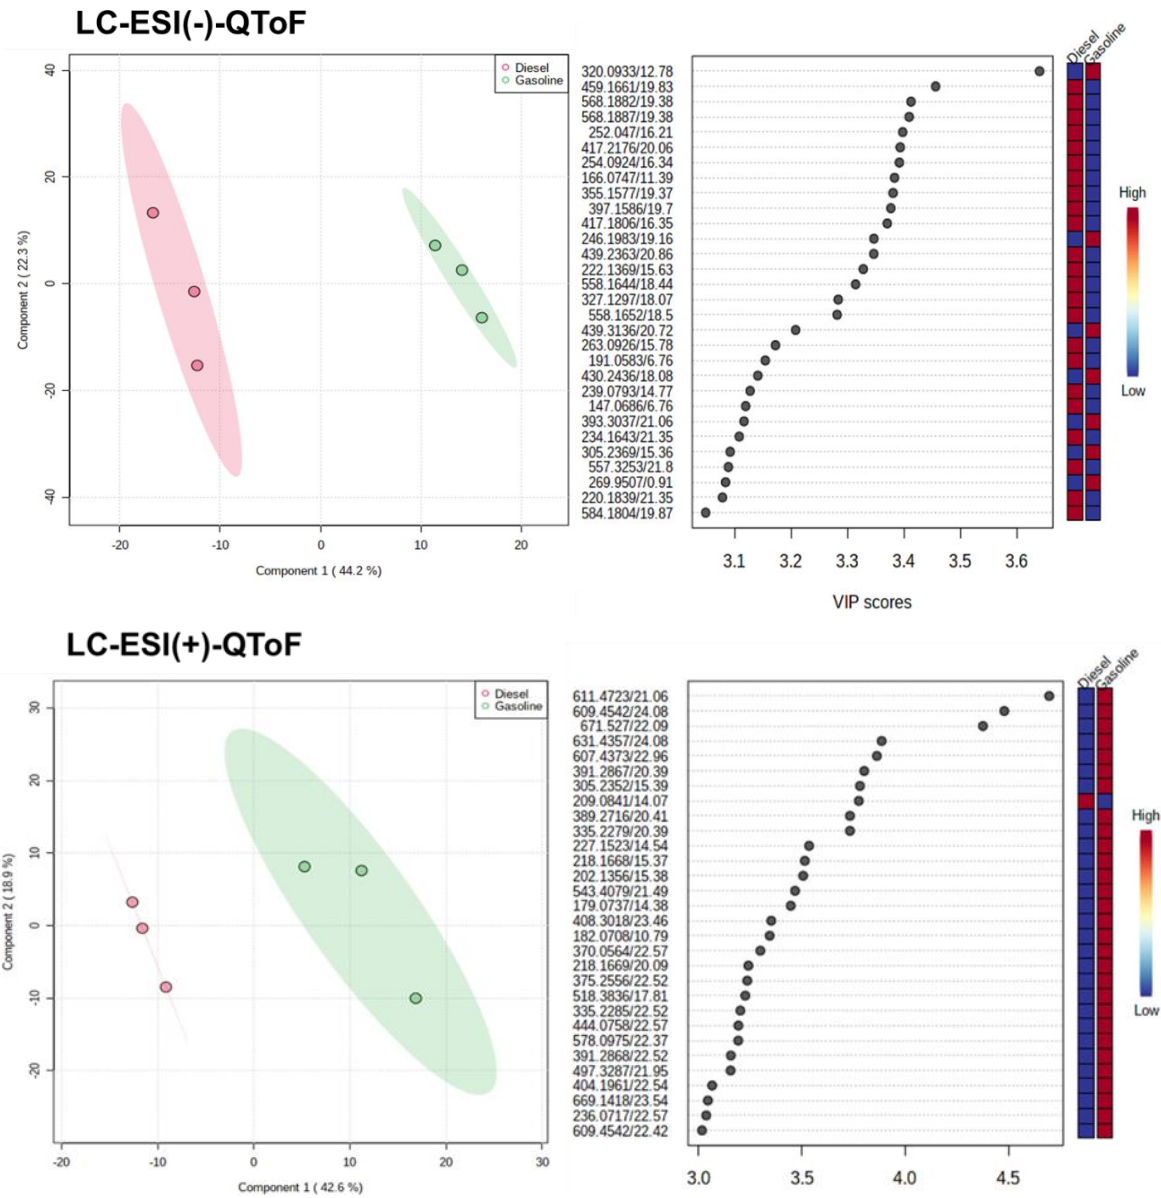

Figure S21. Partial Least Square–Discriminant Analysis (PLS-DA) of POA samples from gasoline and Diesel vehicles. The results are obtained from the GC-QToF and LC-QToF (both positive and negative mode) data and were normalized by pooled QC samples, log-transformed and auto-scaled. The ellipses represent the 95 % confidence zones. Classification of chemical entities (left scale: molecular mass/retention time) characteristic of each vehicular source according to the VIP score are displayed on the right. The colour scale indicates the variation in abundance of the chemical entity (100 % = red, 0 % = blue) in all samples of both vehicles. Only the first 30 chemical entities with the highest VIP scores are shown on the graph.



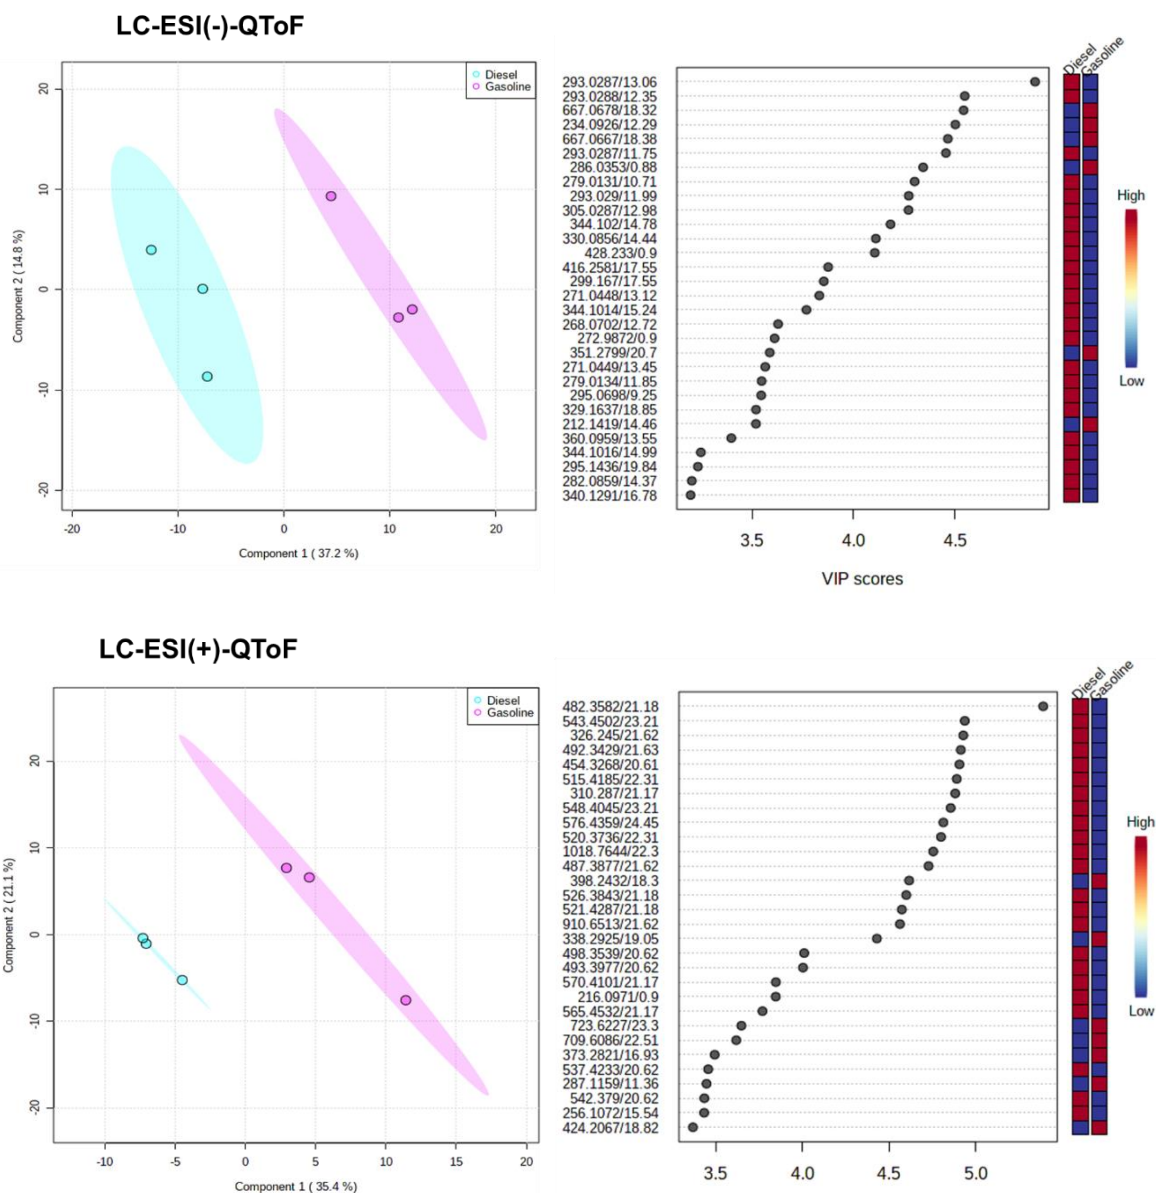

**Figure S22. Partial Least Square–Discriminant Analysis (PLS-DA) of SOA samples from gasoline and Diesel vehicles.** The results are obtained from the GC-QToF and LC-QToF (positive and negative mode) data and were normalized by pooled QC samples, log-transformed and auto-scaled. The ellipses represent the 95 % confidence zones. Classification of chemical entities (left scale: molecular mass /retention time for LC) characteristic of each vehicular source according to the VIP score are displayed on the right. The colour scale indicates the variation in abundance of the chemical entity (100 % = red, 0 % = blue) in all samples of both vehicles. Only the first 30 chemical entities with the highest VIP scores are shown on the graph.

## 8 Tentative identifications of POA and SOA markers

**Table S12.** Selected markers (molecular mass or base peak, Da/retention time, min) and their tentative identification. Questionable molecular formulas are highlighted in yellow (see 3.3 in the main text).

| POA Diesel                         |                |                                                                                                                                                                                      | POA Gasoline           |                |                                                                                                                                                         | SOA Diesel            |                 |                                                                                                                                                                                                                               | SOA Gasoline          |                |                                                                                                                      |
|------------------------------------|----------------|--------------------------------------------------------------------------------------------------------------------------------------------------------------------------------------|------------------------|----------------|---------------------------------------------------------------------------------------------------------------------------------------------------------|-----------------------|-----------------|-------------------------------------------------------------------------------------------------------------------------------------------------------------------------------------------------------------------------------|-----------------------|----------------|----------------------------------------------------------------------------------------------------------------------|
|                                    |                |                                                                                                                                                                                      | GC-QToF                |                |                                                                                                                                                         |                       |                 |                                                                                                                                                                                                                               |                       |                |                                                                                                                      |
| <i>GC POA D-1</i>                  | 68.0256/7.57   | 2H-Pyran-2-one                                                                                                                                                                       | <i>GC POA G-1</i>      | 208.0885/21.02 | -                                                                                                                                                       | <i>GC SOA D-1</i>     | 101.0597/16.16  | -                                                                                                                                                                                                                             | <i>GC SOA G-1</i>     | 127.0750/8.49  | -                                                                                                                    |
|                                    |                |                                                                                                                                                                                      |                        |                |                                                                                                                                                         |                       |                 |                                                                                                                                                                                                                               | <i>GC SOA G-2</i>     | 129.0909/11.56 | -                                                                                                                    |
| <b>LC-QToF (ESI negative mode)</b> |                |                                                                                                                                                                                      |                        |                |                                                                                                                                                         |                       |                 |                                                                                                                                                                                                                               |                       |                |                                                                                                                      |
| <i>LC NEG POA D-1</i>              | 254.0924/16.34 | C <sub>9</sub> H <sub>23</sub> CoO <sub>4</sub><br>C <sub>8</sub> H <sub>16</sub> CaN <sub>5</sub> O <sub>2</sub><br>C <sub>10</sub> H <sub>18</sub> Al <sub>2</sub> NO <sub>3</sub> | <i>LC NEG POA G-1</i>  | 320.0933/12.78 | C <sub>7</sub> H <sub>27</sub> MnNO <sub>5</sub> Si<br>C <sub>8</sub> H <sub>26</sub> Al <sub>4</sub> NO <sub>3</sub> Si                                | <i>LC NEG SOA D-1</i> | 271.0499/13.45  | C <sub>8</sub> H <sub>13</sub> Al <sub>2</sub> N <sub>2</sub> O <sub>5</sub><br>C <sub>5</sub> H <sub>16</sub> CoN <sub>4</sub> O <sub>5</sub><br>C <sub>9</sub> H <sub>9</sub> Al <sub>2</sub> N <sub>2</sub> O <sub>5</sub> | <i>LC NEG SOA G-1</i> | 234.0926/12.29 | C <sub>7</sub> H <sub>20</sub> Al <sub>2</sub> N <sub>2</sub> OS<br>C <sub>10</sub> H <sub>18</sub> O <sub>4</sub> S |
| <i>LC NEG POA D-2</i>              | 327.1297/18.07 | C <sub>16</sub> H <sub>24</sub> Al <sub>3</sub> NO<br>C <sub>12</sub> H <sub>13</sub> N <sub>11</sub> O                                                                              |                        |                |                                                                                                                                                         | <i>LC NEG SOA D-2</i> | 279.0131/10.71  | C <sub>12</sub> H <sub>7</sub> O <sub>8</sub>                                                                                                                                                                                 |                       |                |                                                                                                                      |
| <i>LC NEG POA D-3</i>              | 355.1577/19.37 | C <sub>17</sub> H <sub>22</sub> AlN <sub>5</sub> O <sub>2</sub><br>C <sub>20</sub> H <sub>28</sub> CoN <sub>2</sub>                                                                  |                        |                |                                                                                                                                                         | <i>LC NEG SOA D-3</i> | 293.0287/13.06  | C <sub>10</sub> H <sub>11</sub> Al <sub>2</sub> N <sub>2</sub> O <sub>5</sub><br>C <sub>11</sub> H <sub>7</sub> N <sub>3</sub> O <sub>7</sub>                                                                                 |                       |                |                                                                                                                      |
| <i>LC NEG POA D-4</i>              | 397.1586/19.70 | C <sub>19</sub> H <sub>28</sub> Al <sub>3</sub> N <sub>2</sub> O <sub>2</sub><br>C <sub>19</sub> H <sub>32</sub> CaMnN <sub>3</sub>                                                  |                        |                |                                                                                                                                                         | <i>LC NEG SOA D-4</i> | 293.0290/11.99  | C <sub>13</sub> H <sub>9</sub> O <sub>8</sub><br>C <sub>11</sub> H <sub>7</sub> N <sub>3</sub> O <sub>7</sub>                                                                                                                 |                       |                |                                                                                                                      |
| <i>LC NEG POA D-5</i>              | 417.1806/16.35 | C <sub>15</sub> H <sub>28</sub> AlN <sub>5</sub> O <sub>7</sub>                                                                                                                      |                        |                |                                                                                                                                                         | <i>LC NEG SOA D-5</i> | 305.0287/12.98  | C <sub>14</sub> H <sub>9</sub> O <sub>8</sub>                                                                                                                                                                                 |                       |                |                                                                                                                      |
| <i>LC NEG POA D-6</i>              | 459.1661/19.83 | C <sub>21</sub> H <sub>29</sub> Al <sub>2</sub> N <sub>2</sub> O <sub>6</sub><br>C <sub>20</sub> H <sub>23</sub> Al <sub>2</sub> N <sub>9</sub> O                                    |                        |                |                                                                                                                                                         | <i>LC NEG SOA D-6</i> | 330.0856/14.44  | C <sub>16</sub> H <sub>14</sub> N <sub>2</sub> O <sub>6</sub><br>C <sub>15</sub> H <sub>18</sub> Al <sub>2</sub> NO <sub>4</sub>                                                                                              |                       |                |                                                                                                                      |
|                                    |                | C <sub>31</sub> H <sub>32</sub> Al <sub>4</sub> N <sub>4</sub>                                                                                                                       |                        |                |                                                                                                                                                         | <i>LC NEG SOA D-7</i> | 344.1020/14.78  | C <sub>18</sub> H <sub>12</sub> N <sub>6</sub> O <sub>2</sub>                                                                                                                                                                 |                       |                |                                                                                                                      |
| <i>LC NEG POA D-7</i>              | 568.1882/19.38 | C <sub>27</sub> H <sub>32</sub> Al <sub>2</sub> CaN <sub>4</sub> O<br>C <sub>25</sub> H <sub>41</sub> AlCoN                                                                          |                        |                |                                                                                                                                                         | <i>LC NEG SOA D-8</i> | 360.0959/13.55  | C <sub>14</sub> H <sub>18</sub> Al <sub>2</sub> N <sub>4</sub> O <sub>4</sub><br>C <sub>18</sub> H <sub>12</sub> N <sub>6</sub> O <sub>3</sub>                                                                                |                       |                |                                                                                                                      |
| <i>LC NEG POA D-8</i>              | 584.1804/19.87 | C <sub>28</sub> H <sub>43</sub> AlCo <sub>2</sub> N <sub>2</sub> O <sub>2</sub>                                                                                                      |                        |                |                                                                                                                                                         |                       |                 | C <sub>12</sub> H <sub>32</sub> Mn <sub>2</sub> NO <sub>2</sub> Si                                                                                                                                                            |                       |                |                                                                                                                      |
| <b>LC-QToF (ESI positive mode)</b> |                |                                                                                                                                                                                      |                        |                |                                                                                                                                                         |                       |                 |                                                                                                                                                                                                                               |                       |                |                                                                                                                      |
| <i>LC POS POA D-1</i>              | 209.0841/14.07 | C <sub>14</sub> H <sub>11</sub> NO<br>C <sub>12</sub> H <sub>9</sub> N <sub>4</sub><br>C <sub>8</sub> H <sub>15</sub> MnN <sub>3</sub> O                                             | <i>LC POS POA G-1</i>  | 202.1356/15.39 | C <sub>12</sub> H <sub>16</sub> N <sub>3</sub><br>C <sub>14</sub> H <sub>18</sub> O                                                                     | <i>LC POS SOA D-1</i> | 576.4359/24.45  | C <sub>30</sub> H <sub>60</sub> N <sub>2</sub> O <sub>8</sub>                                                                                                                                                                 | <i>LC POS SOA G-1</i> | 287.1156/11.36 | C <sub>16</sub> H <sub>17</sub> NO <sub>4</sub><br>C <sub>14</sub> H <sub>15</sub> N <sub>4</sub> O <sub>3</sub>     |
|                                    |                |                                                                                                                                                                                      | <i>LC POS POA G-2</i>  | 305.2352/15.39 | C <sub>17</sub> H <sub>29</sub> N <sub>4</sub> O<br>C <sub>19</sub> H <sub>31</sub> NO <sub>2</sub><br>C <sub>12</sub> H <sub>36</sub> MnN <sub>5</sub> | <i>LC POS SOA D-2</i> | 1018.7644/22.30 | N.A.                                                                                                                                                                                                                          |                       |                |                                                                                                                      |
|                                    |                |                                                                                                                                                                                      | <i>LC POS POA G-3</i>  | 335.2279/20.39 | C <sub>23</sub> H <sub>29</sub> NO<br>C <sub>21</sub> H <sub>27</sub> N <sub>4</sub>                                                                    |                       |                 |                                                                                                                                                                                                                               |                       |                |                                                                                                                      |
|                                    |                |                                                                                                                                                                                      | <i>LC POS POA G-4</i>  | 375.2556/22.52 | C <sub>24</sub> H <sub>31</sub> N <sub>4</sub><br>C <sub>26</sub> H <sub>33</sub> NO<br>C <sub>25</sub> H <sub>33</sub> N <sub>4</sub>                  |                       |                 |                                                                                                                                                                                                                               |                       |                |                                                                                                                      |
|                                    |                |                                                                                                                                                                                      | <i>LC POS POA G-5</i>  | 389.2716/20.41 | C <sub>22</sub> H <sub>42</sub> MnN <sub>2</sub><br>C <sub>27</sub> H <sub>35</sub> NO<br>C <sub>25</sub> H <sub>35</sub> N <sub>4</sub>                |                       |                 |                                                                                                                                                                                                                               |                       |                |                                                                                                                      |
|                                    |                |                                                                                                                                                                                      | <i>LC POS POA G-6</i>  | 391.2867/20.39 | C <sub>27</sub> H <sub>37</sub> NO                                                                                                                      |                       |                 |                                                                                                                                                                                                                               |                       |                |                                                                                                                      |
|                                    |                |                                                                                                                                                                                      | <i>LC POS POA G-7</i>  | 543.4079/21.49 | C <sub>37</sub> H <sub>53</sub> NO <sub>2</sub><br>C <sub>35</sub> H <sub>51</sub> N <sub>4</sub> O                                                     |                       |                 |                                                                                                                                                                                                                               |                       |                |                                                                                                                      |
|                                    |                |                                                                                                                                                                                      | <i>LC POS POA G-8</i>  | 607.4373/22.96 | C <sub>42</sub> H <sub>57</sub> NO <sub>2</sub>                                                                                                         |                       |                 |                                                                                                                                                                                                                               |                       |                |                                                                                                                      |
|                                    |                |                                                                                                                                                                                      | <i>LC POS POA G-9</i>  | 609.4542/24.08 | C <sub>40</sub> H <sub>57</sub> N <sub>4</sub> O<br>C <sub>42</sub> H <sub>59</sub> NO <sub>2</sub>                                                     |                       |                 |                                                                                                                                                                                                                               |                       |                |                                                                                                                      |
|                                    |                |                                                                                                                                                                                      | <i>LC POS POA G-10</i> | 611.4723/21.06 | C <sub>34</sub> H <sub>74</sub> Al <sub>2</sub> CoO<br>C <sub>42</sub> H <sub>61</sub> NO <sub>2</sub>                                                  |                       |                 |                                                                                                                                                                                                                               |                       |                |                                                                                                                      |
|                                    |                |                                                                                                                                                                                      | <i>LC POS POA G-11</i> | 671.5270/22.09 | C <sub>45</sub> H <sub>69</sub> NO <sub>3</sub><br>C <sub>42</sub> H <sub>71</sub> Al <sub>2</sub> N <sub>3</sub>                                       |                       |                 |                                                                                                                                                                                                                               |                       |                |                                                                                                                      |

## 8 Some examples of chromatographic responses of markers.

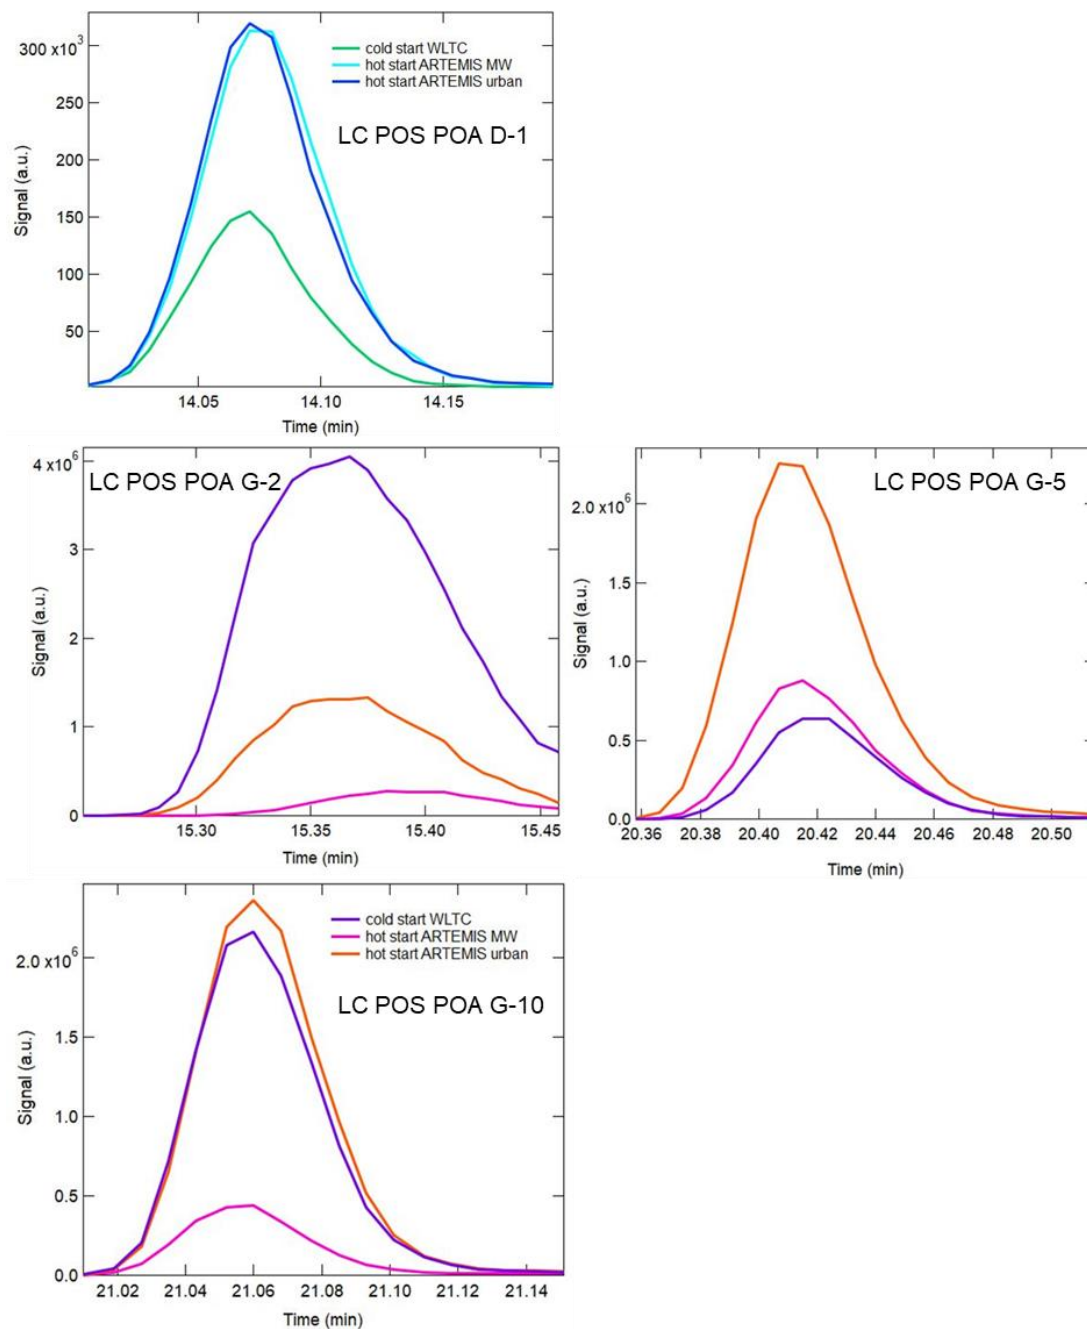

Figure S23. Potential molecular markers characteristic of Diesel and gasoline POA from LC-QToF data in positive mode (ESI+). Chromatographic response observed for selected markers in ambient start WLTC, hot-start CADC motorway (MW) and urban driving conditions.

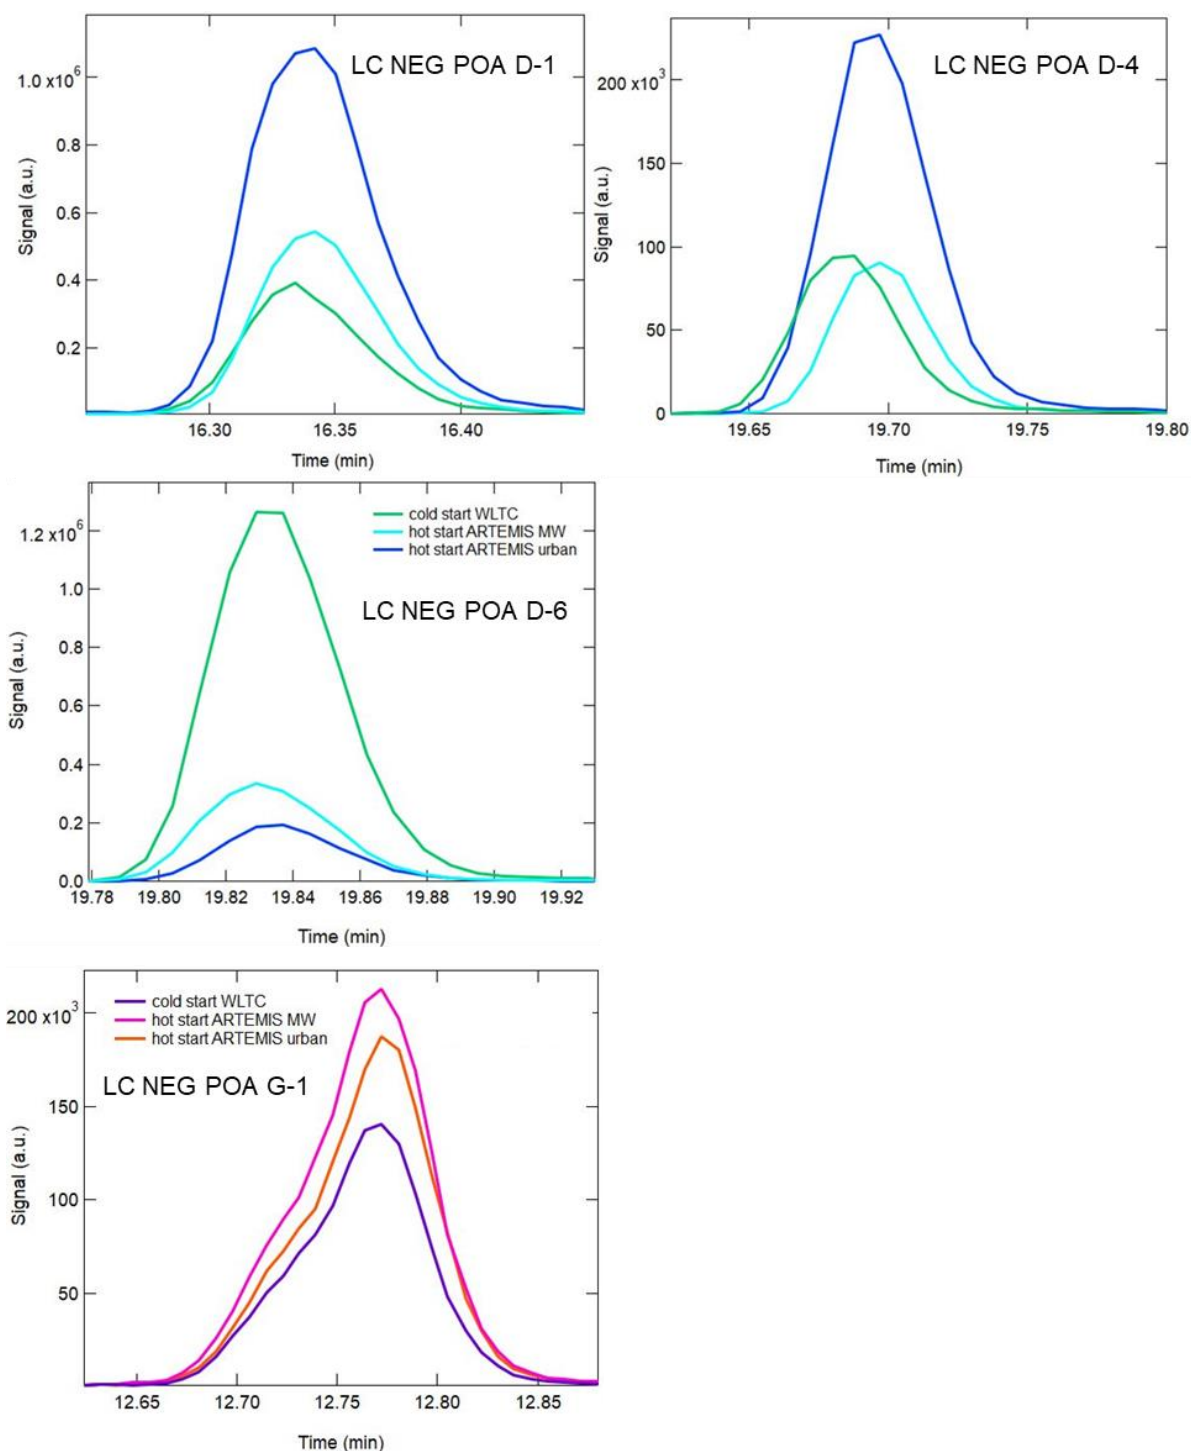

**Figure S24. Potential molecular markers characteristic of Diesel and gasoline POA from LC-QToF data in negative mode (ESI<sup>-</sup>). Chromatographic response observed for selected markers in ambient start WLTC, hot-start CADC motorway (MW) and urban driving conditions.**

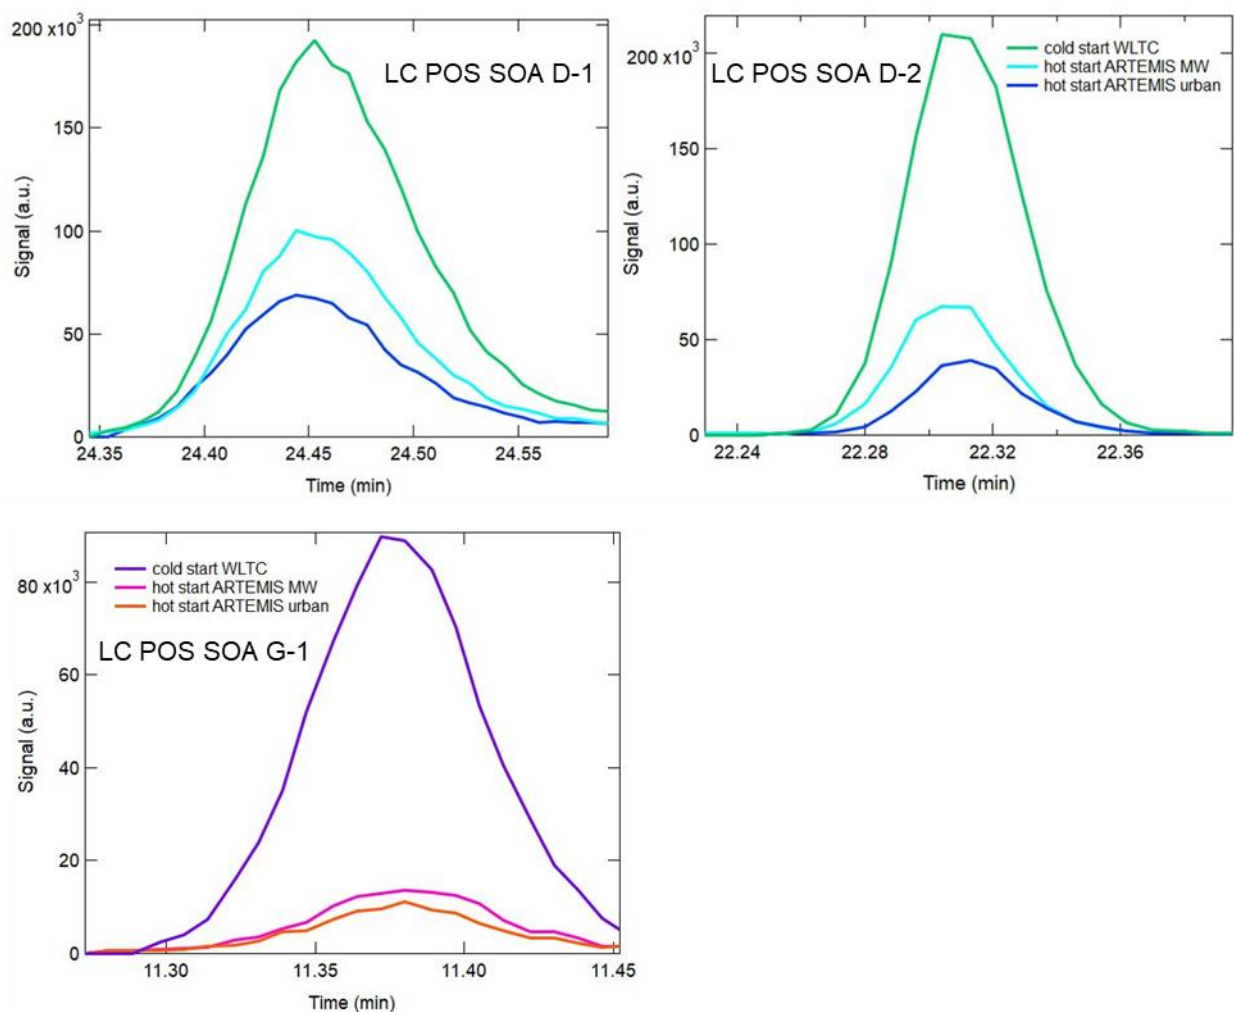

**Figure S25. Potential molecular markers characteristic of Diesel and gasoline SOA from LC-QToF data in positive mode (ESI+). Chromatographic response observed for selected markers in ambient start WLTC, hot-start CADC motorway (MW) and urban driving conditions.**

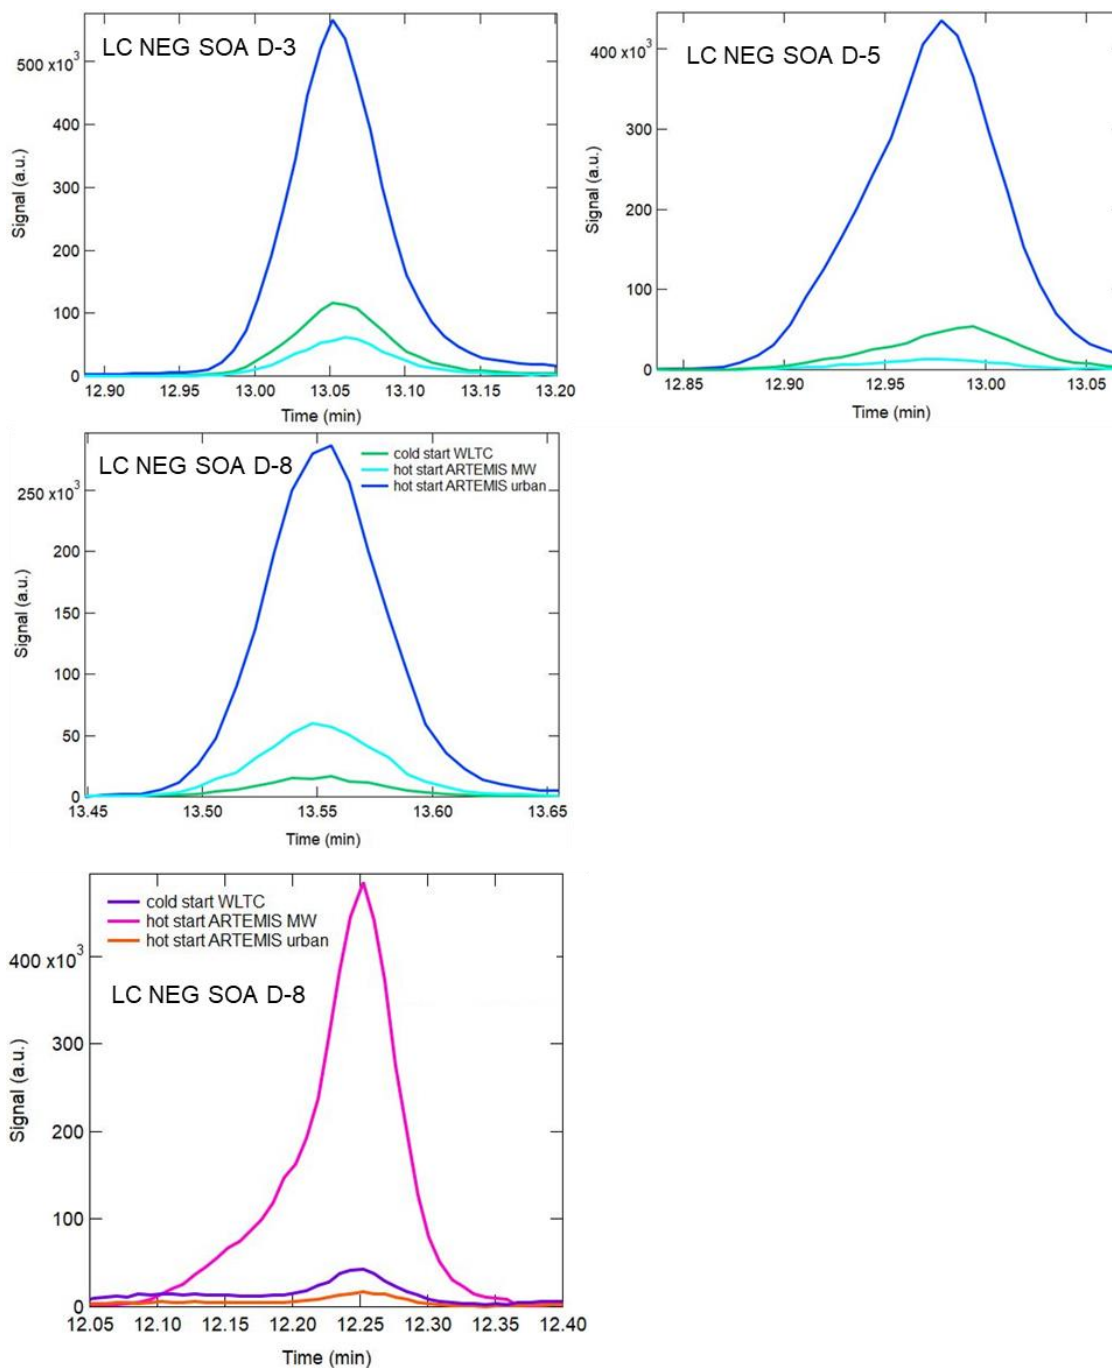

25 **Figure S26. Potential molecular markers characteristic of Diesel and gasoline SOA from LC-QToF data in negative mode (ESI<sup>-</sup>). Chromatographic response observed for selected markers in ambient start WLTC, hot-start CADC motorway (MW) and urban driving conditions.**

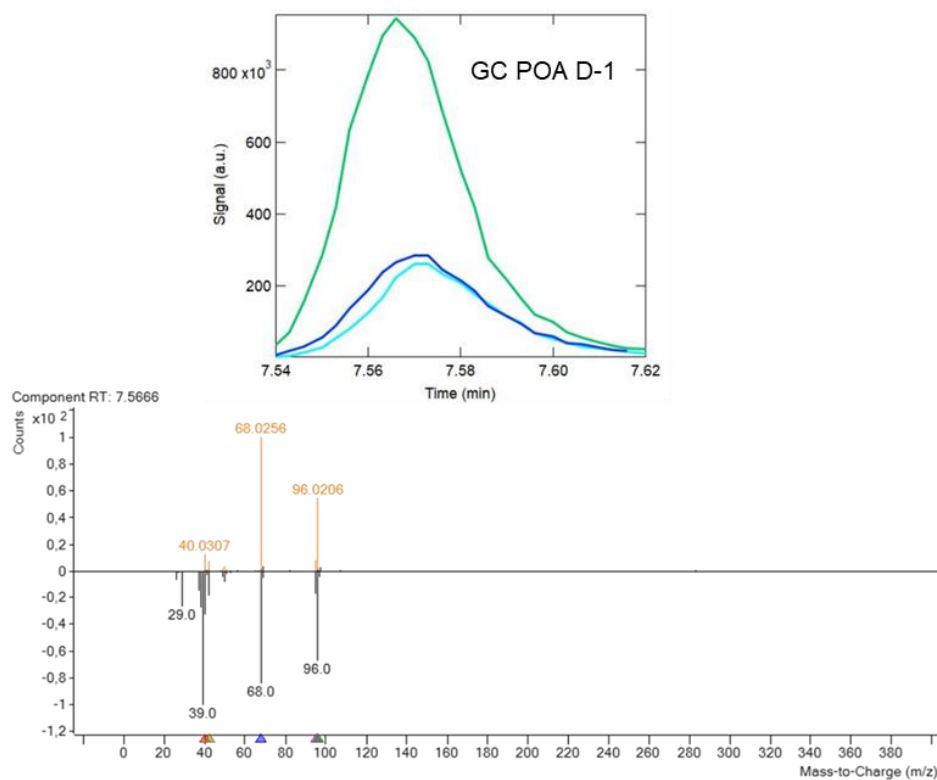

Figure S27. Chromatographic response of the feature base peak ( $m/z = 68.0256$ ) and head-to-tail EI mass spectra of the POA Diesel marker GC-POA D-1 and the 2H-pyran-2-one from GC-QToF data (acquisition started at 40  $m/z$ ).



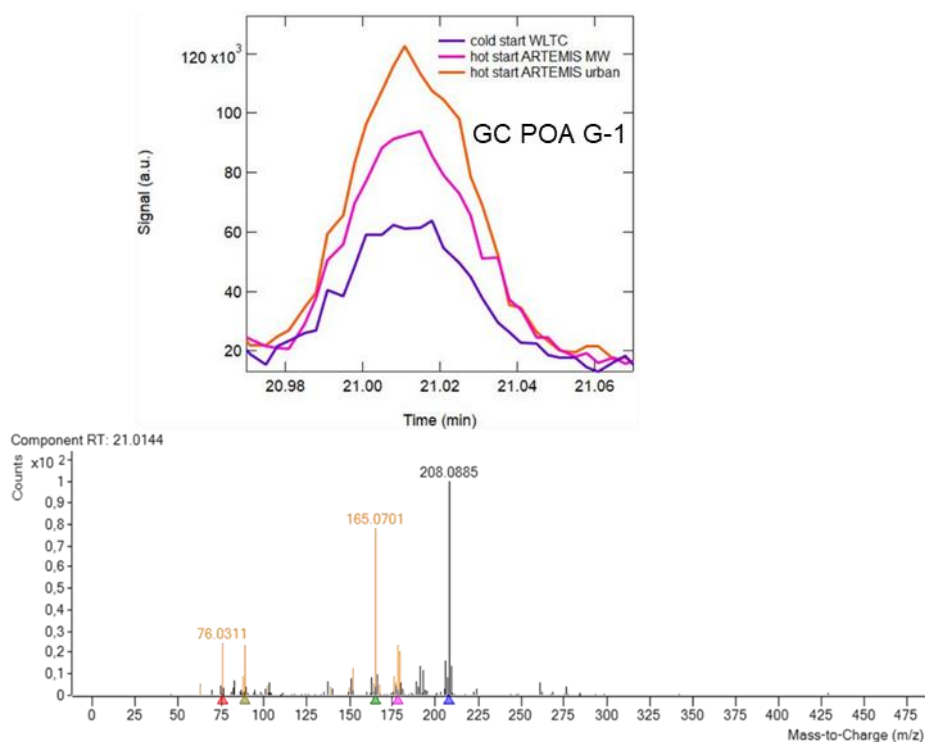

Figure S28. Chromatographic response of the feature base peak ( $m/z = 208.0885$ ) and the EI mass spectra of the POA gasoline marker GC POA G-1 from GC-QToF data (acquisition started at 40  $m/z$ ).

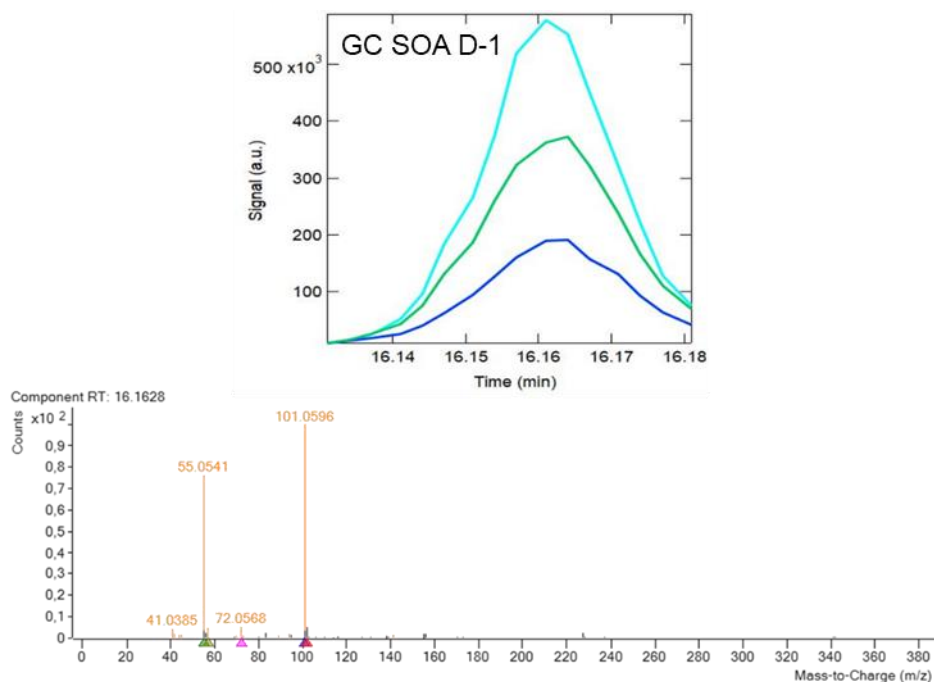

35 Figure S29. Chromatographic response of the feature base peak ( $m/z = 101.0597$ ) and the EI mass spectra of the SOA Diesel marker GC SOA D-1 from GC-QToF data (acquisition started at 40  $m/z$ ).



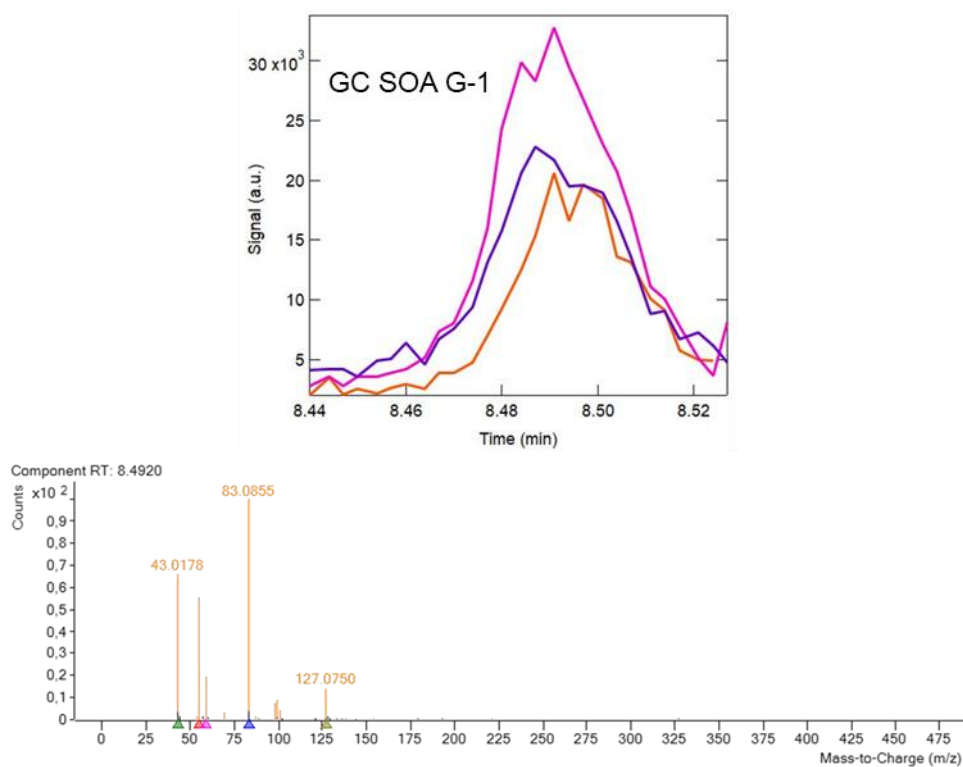

**Figure S30. Chromatographic response of the feature base peak ( $m/z = 127.0750$ ) and the EI mass spectra of for one SOA gasoline marker GC SOA G-1 from GC-QToF data (acquisition started at 40  $m/z$ ).**

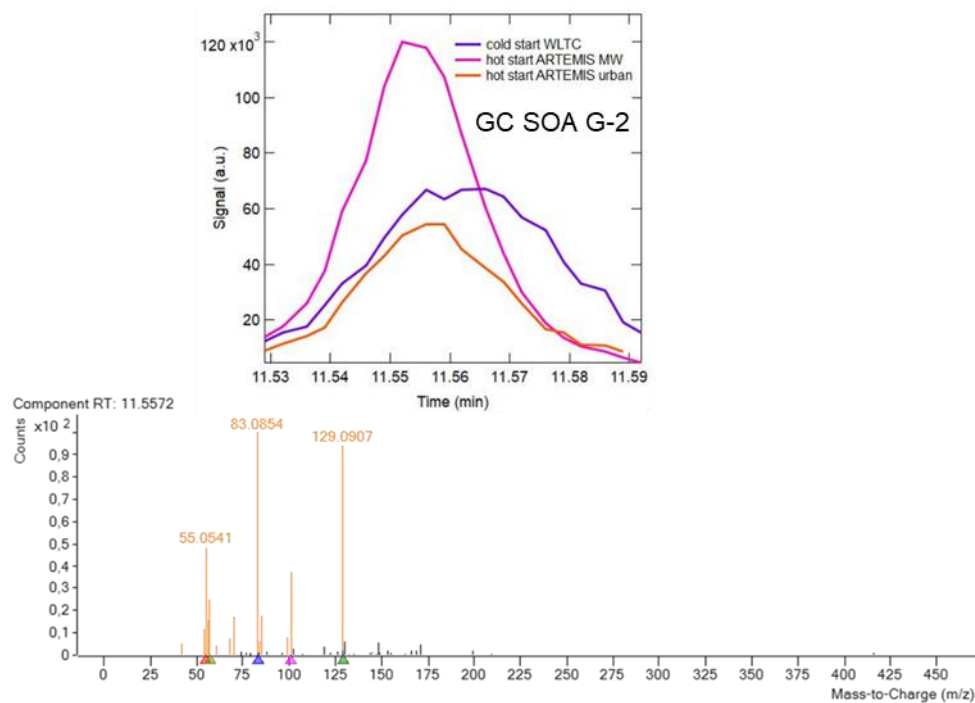

**Figure S31. Chromatographic response of the feature base peak ( $m/z = 129.0909$ ) and the EI mass spectra of one SOA gasoline marker GC SOA G-2 from GC-QToF data (acquisition started at 40  $m/z$ ).**
